# Supplementary material for: Holocene vegetation dynamics and sedimentation processes in a small depression on a Pleistocene plain – a multi-proxy approach for the palaeoenvironmental reconstruction of a Neolithic settlement area near Leipzig, Saxony
Source: Copernicus journal article supplement (doi:10.5194/egqsj-74-79-2025), 2025-02-25
Supplement: Supplementary file 1 [file egqsj-74-79-2025-supplement.zip]

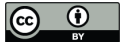

*Supplement of*

**Holocene vegetation dynamics and sedimentation processes in a small depression on a Pleistocene plain – a multi-proxy approach for the palaeoenvironmental reconstruction of a Neolithic settlement area near Leipzig, Saxony**

**Christian Tinapp et al.**

*Correspondence to:* Christian Tinapp ([christian.tinapp@lfa.sachsen.de](mailto:christian.tinapp@lfa.sachsen.de))

- [egqsj-74-79-2025-supplement-title-page.pdf](#)
- [Kieritzsch-site\\_KIE-16\\_Geochemical data.xlsx](#)
- [Kieritzsch-site\\_KIE-16\\_MM\\_profil58.pdf](#)
- [Kieritzsch-site\\_Kie16\\_pollendata.csv](#)

The copyright of individual parts of the supplement might differ from the article licence.
