# Supplementary material for: Holocene vegetation dynamics and sedimentation processes in a small depression on a Pleistocene plain – a multi-proxy approach for the palaeoenvironmental reconstruction of a Neolithic settlement area near Leipzig, Saxony
Source: Copernicus journal article supplement (doi:10.5194/egqsj-74-79-2025), 2025-02-25
Supplement: Supplementary file 1 [file egqsj-74-79-2025-supplement.zip]

## Sheet: bophy
	Name	Einheit	m GOK	m GOK	pH (0,01 M CaCl2)	Nt (%)	Ct (%)	CaCO3(%)	Cinorg(%)	Corg (%)	S (%)	Si (%)	C (%)	cS (%)	mS (%)	fS (%)	ffS (%)	cSi (%)	mSi (%)	fSi (%)	cC (%)	mC (%)	fC (%)
	KIE-16_1	A		142,77-142,52	7.015	0.2	1.98	0.0854087	0.0102495	1.96975	11.083	62.2	25.7	1.476	5.185	1.958	2.464	26.3	26.2	9.7	5.8	6.2	13.7
	KIE-16_2	B		142,52-142,47	7.023	0.13	0.79	0.022039	0.00264479	0.787355	12.27	63.4	24	2.379	5.645	1.915	2.331	27.6	25.7	10.1	4.7	5.5	13.8
	KIE-16_3	C		142,47-142,37	6.867	0.47	7	0.0275497	0.00330609	6.99669	0.935	46.8	52.1	0.136	0.409	0.17	0.22	10.4	20.7	15.7	14.1	13.7	24.3
	KIE-16_4	D		142,37-142,27	6.927	0.37	5.16	0.0330617	0.00396757	5.15603	0.366	58.8	40.5	0.076	0.002	0.097	0.191	16.8	26.9	15.1	7.8	8.9	23.8
	KIE-16_5	D		142,27-142,17	6.981	0.32	4.44	0.0247912	0.00297506	4.43702	0.514	60.1	39.4	0.088	0.136	0.082	0.208	15.1	28.5	16.5	7.8	8.6	23
	KIE-16_6	D		142,17-142,07	7.121	0.59	8.13	0.71598	0.085921	8.04408	3.515	50.5	45.5	0.597	1.658	0.551	0.709	12.9	20.4	17.2	11.9	11.7	21.9
	KIE-16_7	E		142,07-141,97	7.354	0.48	8.21	16.1005	1.93214	6.27786	8.915	55.1	35	1.297	3.932	1.462	2.224	15.7	24.5	14.9	10.7	8.7	15.6
	KIE-16_8	F		141,97-141,87	7.413	0.23	4.35	9.50713	1.1409	3.2091	9.259	54.1	36	1.041	4.497	1.692	2.029	13.9	23.5	16.7	8.8	9.6	17.6
	KIE-16_9	G		141,87-141,72	7.493	0.16	4.01	18.0372	2.16455	1.84545	3.903	63.9	31	0.163	1.446	0.645	1.649	19.7	28.7	15.5	8.2	8.4	14.4
	KIE-16_10	H		141,72-141,50	7.601	0.08	1.57	10.513	1.26161	0.308394	3.434	70.1	26.1	0.728	1.197	0.461	1.048	24.2	33.2	12.7	5.4	4.9	15.8

## Sheet: Elemente
	Name	Einheit	m GOK	m GOK	Na[mg/kg]			K[mg/kg]			Mg[mg/kg]			Ca[mg/kg]			Al[mg/kg]			Ti[mg/kg]			Fe[mg/kg]			Mn[mg/kg]			V[mg/kg]			Cr[mg/kg]			Na2O (molc/kg)	K2O (molc/kg)	MgO (molc/kg)	silikatisch CaO (molc/kg)	Al2O3 (molc/kg)	TiO2 (molc/kg)	Fe2O3 (molc/kg)	MnO (molc/kg)
	KIE-16_1	A		142,77-142,52	5895	±	81	18605	±	35	3914.5	±	41	8392	±	20	53695	±	70	5064	±	10.5	20335	±	20	584.8	±	1.95	56.05	±	3.65	77.25	±	0.85	0.128403	0.237994	0.322061	0.40174	2.98598	0.423046	0.546256	0.0212857
	KIE-16_2	B		142,52-142,47	6104	±	81.5	18515	±	30	3620.5	±	40	5340.5	±	16	52095	±	70	4689	±	10	18190	±	20	256.8	±	1.25	43.2	±	3.3	62.95	±	0.75	0.132955	0.236843	0.297873	0.262071	2.89701	0.391719	0.488636	0.00934708
	KIE-16_3	C		142,47-142,37	4332.5	±	65.5	17045	±	30	4158.5	±	37	14700	±	30	61780	±	70	5187	±	10	23545	±	20	178.55	±	1.1	82.85	±	3.85	81.25	±	0.9	0.0943688	0.218038	0.342136	0.727867	3.43559	0.433322	0.632486	0.00649891
	KIE-16_4	D		142,37-142,27	4987.5	±	74.5	19445	±	40	5187.5	±	43	16040	±	30	65405	±	70	5466.5	±	11	22240	±	20	215.75	±	1.3	80.7	±	4.1	83.6	±	0.95	0.108636	0.248739	0.426796	0.793728	3.63717	0.456671	0.59743	0.00785293
	KIE-16_5	D		142,27-142,17	4914.5	±	71.5	18955	±	35	5247	±	41	15560	±	30	61010	±	70	5310	±	11	22340	±	20	239.15	±	1.3	80.05	±	3.95	82.05	±	0.9	0.107046	0.242471	0.431691	0.771377	3.39277	0.443597	0.600116	0.00870465
	KIE-16_6	D		142,17-142,07	4091.5	±	60	14940	±	30	4963	±	36	23065	±	30	50145	±	60	4119.5	±	9	20120	±	20	218.4	±	1.1	76.3	±	3.3	67.2	±	0.8	0.0891194	0.191111	0.408325	1.00779	2.78857	0.344143	0.540481	0.00794939
	KIE-16_7	E		142,07-141,97	3896	±	53.5	10985	±	20	5023.5	±	32	83755	±	65	41555	±	50	3411	±	9	16505	±	20	210.7	±	1.2	60.55	±	3.25	55.05	±	0.8	0.0848611	0.140519	0.413303	0.962311	2.31088	0.284955	0.443372	0.00766912
	KIE-16_8	F		141,97-141,87	4120.5	±	60	14125	±	30	6456.5	±	39	53600	±	50	52115	±	60	4118.5	±	9	19960	±	20	259.75	±	1.3	61.7	±	3.45	68.05	±	0.8	0.0897511	0.180686	0.531201	0.775073	2.89812	0.344059	0.536183	0.00945446
	KIE-16_9	G		141,87-141,72	4264	±	61	13920	±	30	6810	±	40	87985	±	70	49900	±	60	4183.5	±	10	19085	±	20	289	±	1.5	61.2	±	3.7	65.9	±	0.9	0.0928768	0.178064	0.560285	0.786592	2.77494	0.349489	0.512678	0.0105191
	KIE-16_10	H		141,72-141,50	5714	±	77	19055	±	40	11525	±	50	54645	±	50	57480	±	70	4976.5	±	11	20850	±	20	355.4	±	1.6	66.1	±	4	78.2	±	1	0.12446	0.24375	0.948207	0.626234	3.19647	0.415736	0.560091	0.012936
