# Supplementary material for: Holocene vegetation dynamics and sedimentation processes in a small depression on a Pleistocene plain – a multi-proxy approach for the palaeoenvironmental reconstruction of a Neolithic settlement area near Leipzig, Saxony
Source: Copernicus journal article supplement (doi:10.5194/egqsj-74-79-2025), 2025-02-25
Supplement: Supplementary file 2 [file egqsj-74-79-2025-supplement.zip]

## Analyse und Interpretation von Dünnschliffen

### Fundstellen KIE-16, Geoprofil 58

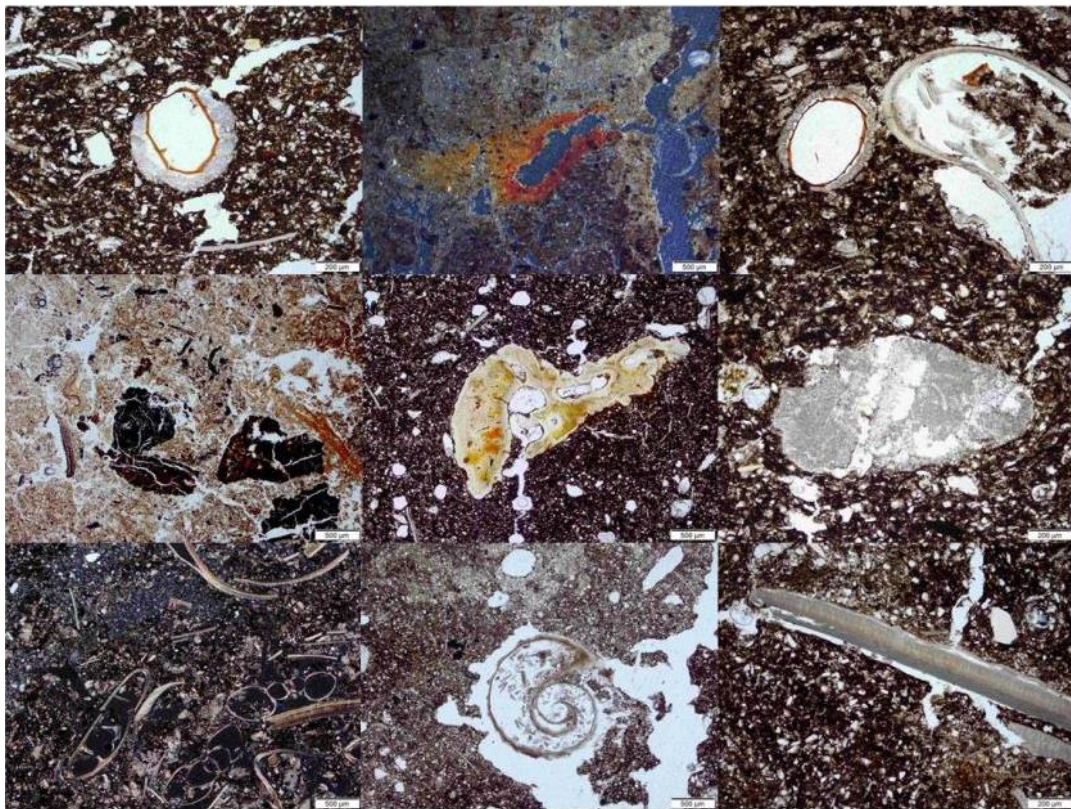

Dr. Susann Heinrich  
Eilenburger Str. 45  
04317 Leipzig  
m@il: [susannmueller@gmx.de](mailto:susannmueller@gmx.de)  
mobil: 0177-4038899

# Inhaltsverzeichnis

|                                                                                                     | Seite     |
|-----------------------------------------------------------------------------------------------------|-----------|
| <b>1. Methoden</b>                                                                                  | <b>4</b>  |
| <b>2. Mikromorphologische Analysen im Bereich der Fundstelle KIE-16, Geoprofil 58, Proben 5,6,7</b> | <b>4</b>  |
| 2.1 Probennahme                                                                                     | 4         |
| 2.2 Fragestellung                                                                                   | 4         |
| 2.3 Beschreibung des Dünnschliffs Probe 5; Einheit D/E                                              | 5         |
| 2.4 Fotodokumentation                                                                               | 6         |
| 2.5 Beschreibung des Dünnschliffs Probe 6; Einheit F/I                                              | 8         |
| 2.6 Fotodokumentation                                                                               | 9         |
| 2.7 Beschreibung des Dünnschliffs Probe 7, Einheit M                                                | 11        |
| 2.8 Fotodokumentation                                                                               | 12        |
| <b>3. Mikromorphologische Analysen im Bereich der Fundstelle KIE-16, Geoprofil 58, Proben 8-12</b>  | <b>15</b> |
| 3.1 Probennahme                                                                                     | 15        |
| 3.2 Fragestellung                                                                                   | 15        |
| 3.3 Beschreibung des Dünnschliffs Probe 8, Einheit C/D                                              | 16        |
| 3.4 Fotodokumentation                                                                               | 17        |
| 3.5 Beschreibung des Dünnschliffs Probe 9, Einheit D/E                                              | 20        |
| 3.6 Fotodokumentation                                                                               | 21        |
| 3.7 Beschreibung des Dünnschliffs Probe 10, Einheit E/F                                             | 23        |
| 3.8 Fotodokumentation                                                                               | 24        |
| 3.9 Beschreibung des Dünnschliffs Probe 11, Einheiten F/G                                           | 26        |
| 3.10 Fotodokumentation                                                                              | 27        |
| 3.11 Beschreibung des Dünnschliffs Probe 12, Einheit G/H                                            | 29        |
| 3.12 Fotodokumentation                                                                              | 30        |
| <b>4. Interpretation der Ergebnisse</b>                                                             | <b>33</b> |
| <b>5. Literatur</b>                                                                                 | <b>36</b> |

## 1. Methoden

Für die Anfertigung von Dünnschliffen wurden mit Hilfe von Aluminiumschienen ungestörte, orientierte Proben entnommen. Die Präparation wurde durch M. Köhler (MKfactory, Ruhlsdorfer Str. 95, Haus 81, 14532 Stahnsdorf) ausgeführt. Die Beschreibung der Dünnschliffe erfolgte mit Hilfe eines Polarisationsmikroskops (Olympus BX 51) überwiegend nach Bullock et al. (1985) und Stoops (2003). Für die Fotodokumentation wurde die Image Analysis Software Olympus Stream Motion genutzt. Die Präparate wurden mit polarisiertem Durchlicht analysiert. Die Lichtarten sind im folgenden Text meist abgekürzt: PPL (plain polarized light, einfach polarisiertes Licht), XPL (crossed polarized light, gekreuzte Polarisatoren) und OIL (oblique incident light, schräg einfallendes Auflicht). Die mikromorphologische Nomenklatur ist meist nicht ohne Kenntnisse der Methode verständlich. Daher wurde zugunsten der besseren Lesbarkeit und des einfacheren Verständnisses ohne oder mit nur wenig Erfahrung im Bereich der Dünnschliffmikroskopie in der Regel auf die methodenspezifische Nomenklatur verzichtet. Stattdessen erfolgt eine Beschreibung der Merkmale mit allgemeinverständlichen Begriffen.

## 2. Mikromorphologische Analysen im Bereich der Fundstelle KIE-16, Geoprofil 58, Proben 5, 6, 7

### 2.1 Probennahme

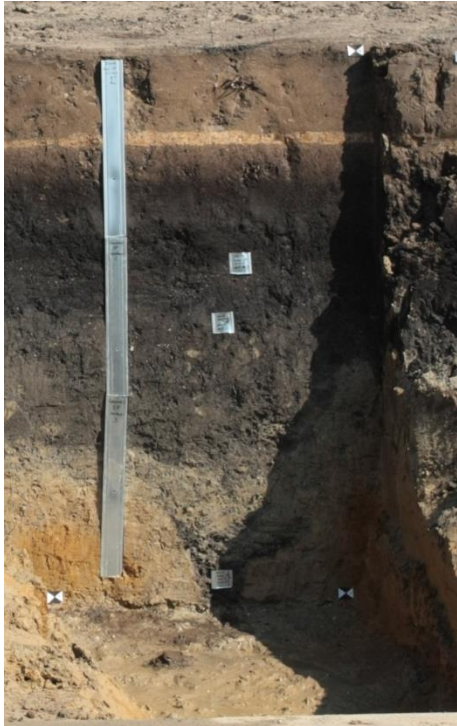

Abb. 1: Fotos zur Entnahmesituation der Proben, von oben nach unten Proben 5, 6, 7

Die Abbildung 1 zeigt die Entnahmesituation der mikromorphologischen Beprobung

**2.2 Fragestellung:** Grube unter schwarzen Sedimenten: Verfüllungsprozesse; Vergleich mit den Dünnschliffen 8-12: Charakterisierung der dunklen Senkensedimente, Genese, Überformung



### 2.3 Beschreibung des Dünnschliffs Probe 5; Einheit D/E

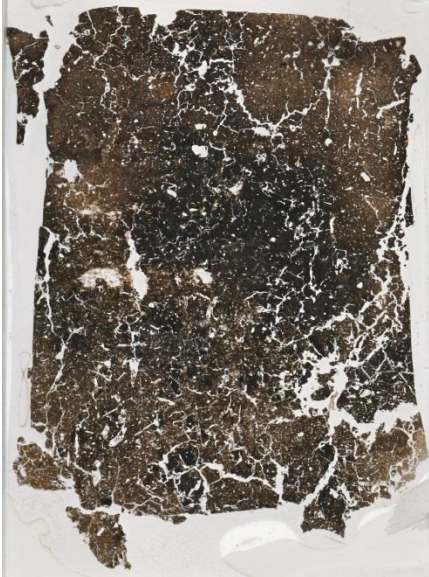

Abb. 2: Scan des Dünnschliffs Probe 5

Der Scan des Dünnschliffs (Abb. 2) zeigt feinkörniges, sehr dunkel gefärbtes Material, dass durch zahlreiche Risse und biogene Hohlräume gegliedert ist. Dabei ist das Substrat zusammenhängend, lediglich am Rand sind probennahme- oder präparationsbedingt einzelne Aggregate abgerissen. Die Färbung des im Schliff erfassten Materials unterscheidet sich zwischen dem oberen Schliffteil, wo fleckig verteilt schwarzes und dunkelbraun gefärbtes Material zu sehen ist und dem unteren Schliffteil in dem etwas weniger schwarze Materialanteile zu finden sind und die helleren Bereiche eine bräunlich-graue Färbung aufweisen. Besonders auffällig sind zudem im unteren Teil des Dünnschliffs die sehr zahlreich auftretenden hellen Objekte (Molluskenschalenfragmente).

Das im Dünnschliff erfasste Substrat ist sehr feinkörnig: Ton und Schluff dominieren, wenige Sandkörner sowie Molluskenschalenfragmente und Knochensplitter bilden die gröbere Kornfraktion. Die sehr dunkle Materialfärbung (dunkelbraun bis schwarz) ist auf den stellenweise extrem hohen Anteil amorpher organischer Substanz zurückzuführen. Das Substrat im Dünnschliff ist etwa in der oberen Hälfte kalkarm bis kalkfrei während die Matrix in der unteren Schliffhälfte carbonathaltig ist. Die Grenze ist nicht scharf ausgeprägt. Außerdem finden sich in beiden Substrattypen biogene Hohlraumfüllungen, die das jeweils aus dem anderen Material bestehen. Im kalkhaltigen Substrat treten calcitische coatings an Hohlraumrändern auf, die als Ausscheidungsprodukte der Wurzelaktivität entstanden sind. Besonders das kalkhaltige Material enthält zudem zahlreiche Fragmente von Schneckenschalen, intakte Exemplare sind kaum vorhanden. Das Substrat im gesamten Dünnschliff (sowohl kalkhaltig, als auch kalkfrei) weist kleine Knochensplitter auf.

Im gesamten Dünnschliff fehlen Spuren, die der Interpretation der Sedimententstehung dienen könnten. Es lassen sich keinerlei Laminierungen oder Ab-/Umlagerungsstrukturen erkennen. Das Substrat ist sehr stark biogen überformt: Überall finden sich biogene Hohlräume und Materialumlagerungen, jedoch ist die biogene Aktivität nicht intensiv genug, um die Schichtung von kalkfreiem auf kalkreichem Substrat vollständig zu homogenisieren.



## 2.4 Fotodokumentation

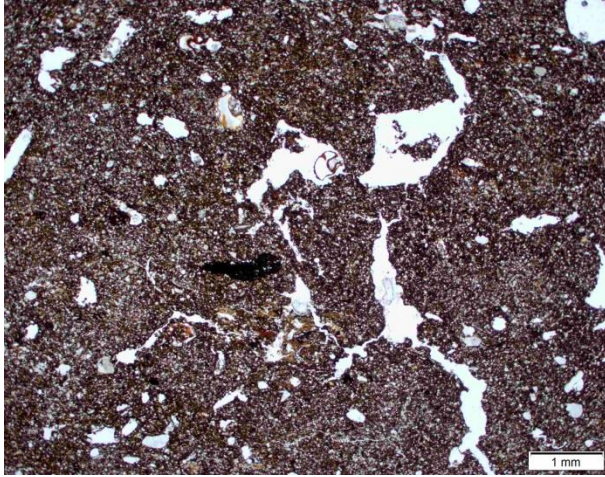

A: typisches Material im oberen Schliffabschnitt

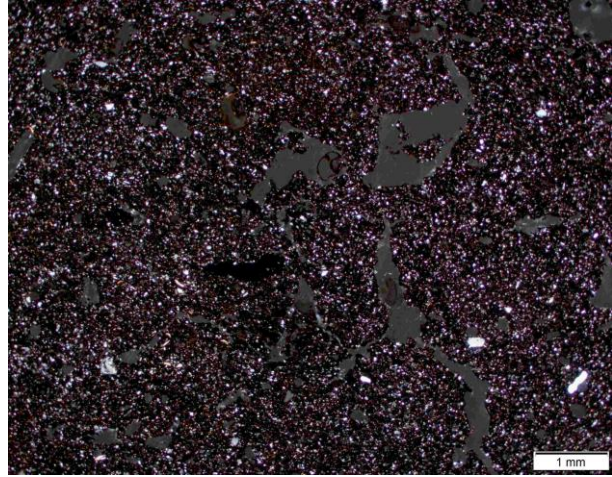

B: wie A, xpl

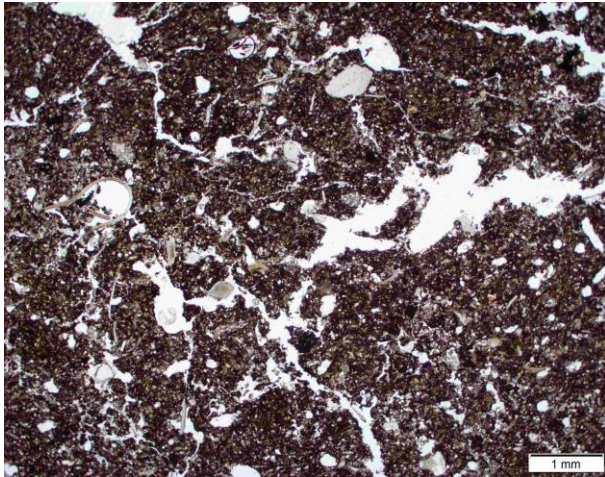

C: typisches Material im unteren Schliffabschnitt

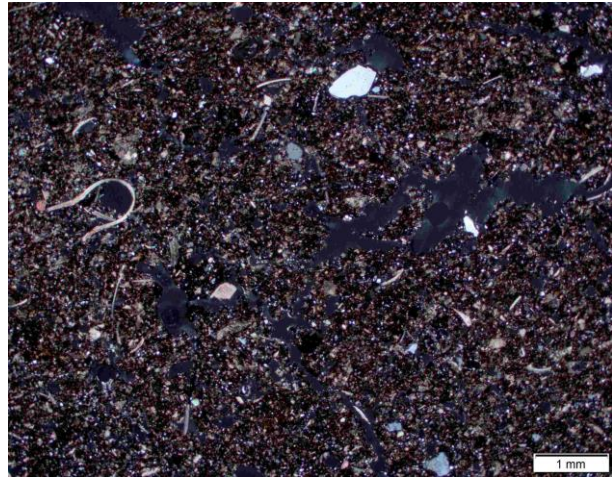

D: wie C, xpl, kalkhaltig

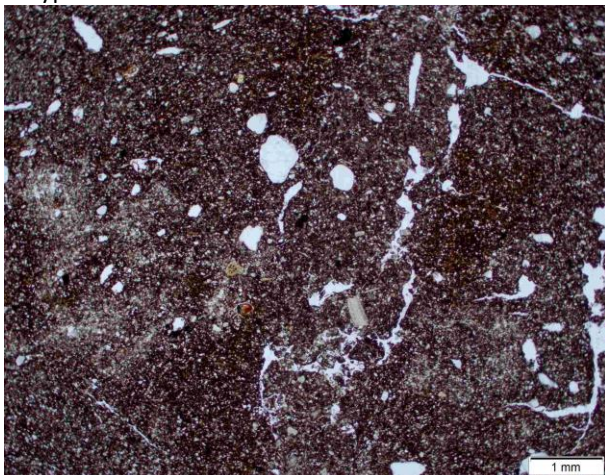

E: kalkhaltige biogene Hohlraumfüllung in kalkarmer/kalkfreier Matrix

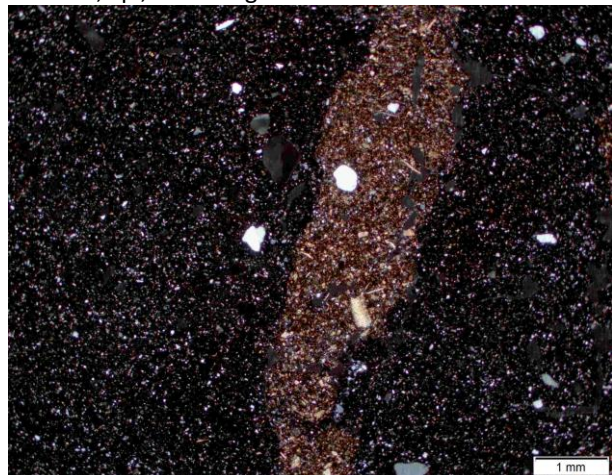

F: wie E, xpl



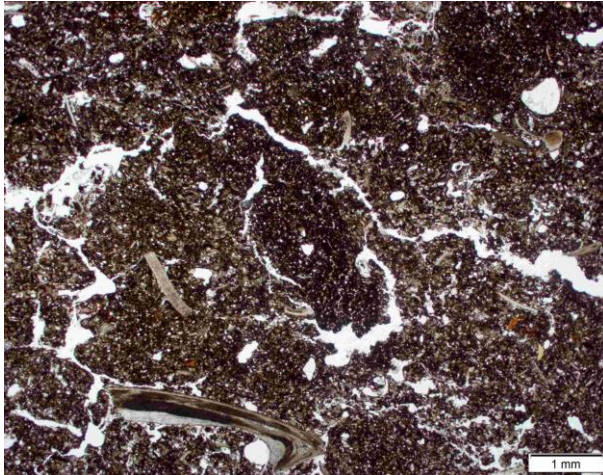

G: humose Hohlraumfüllung (kalkfrei) in kalkhaltige Matrix

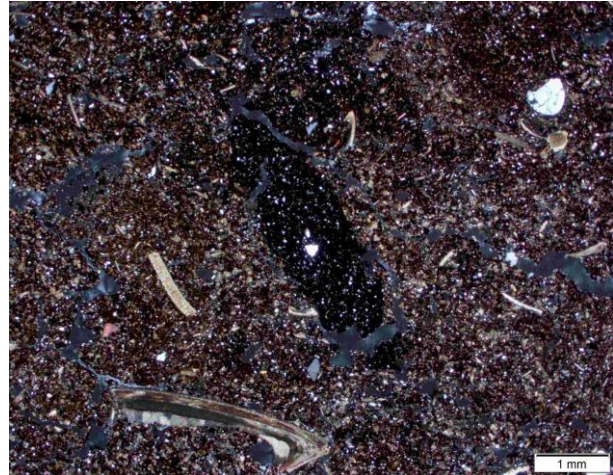

H: wie G, xpl

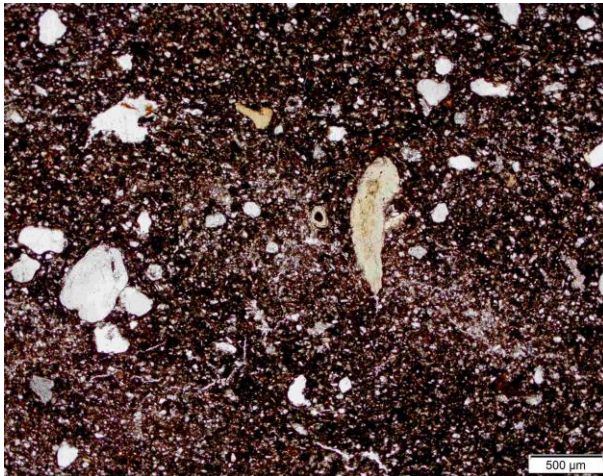

I: Knochenstück im oberen Schliffteil

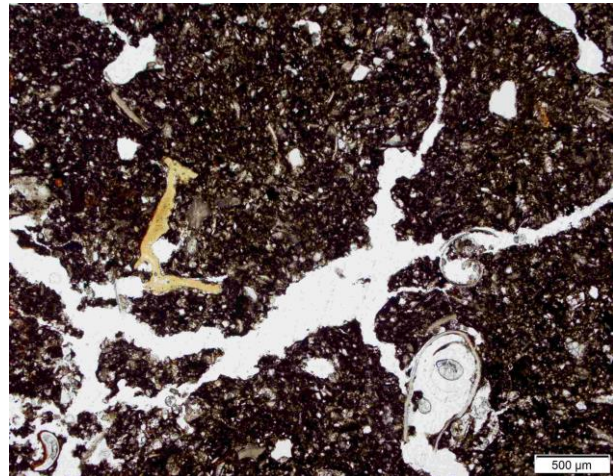

J: Knochenstück und Schnecken-  
schalen im unteren Schliffteil

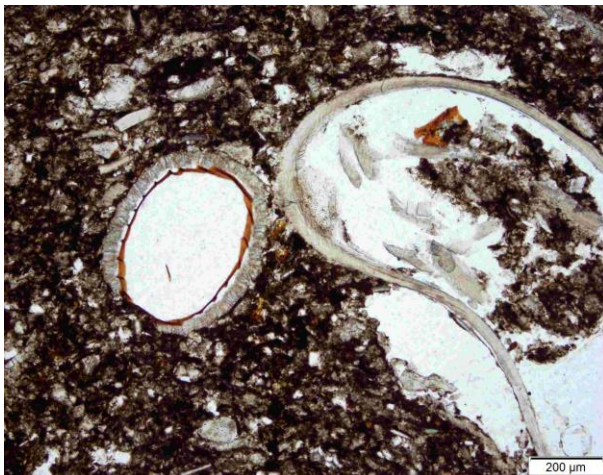

K: calcitisches coating am Hohlraumrand und Schne-  
ckenschale

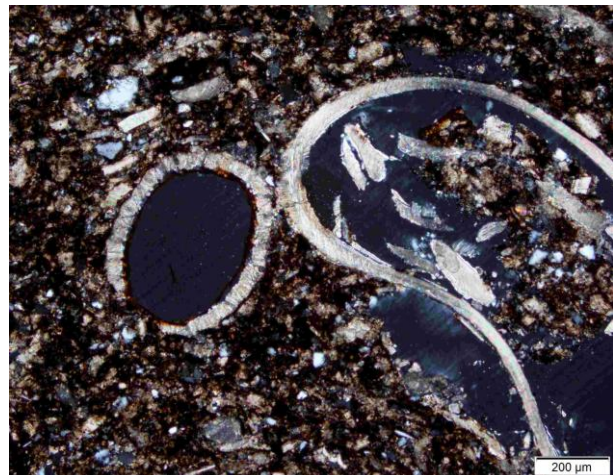

L: wie K, xpl



## 2.5 Beschreibung des Dünnschliffs Probe 6; Einheit F/I

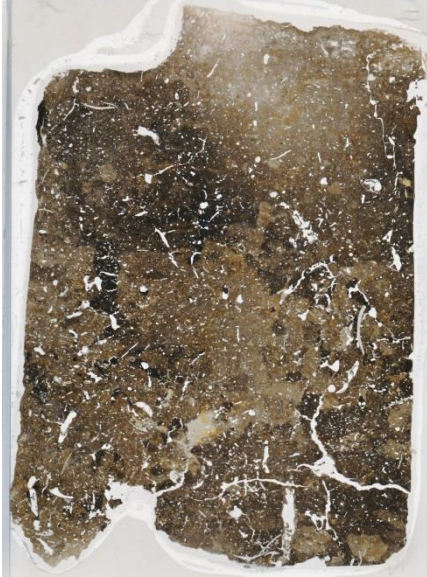

Abb. 4: Scan des Dünnschliffs Probe 6

Der Scan des Dünnschliffs zeigt sehr stark fleckiges Material (vgl. Abb. 4). Die Färbung reicht von hellgrau bis schwarz. Das feinkörnige Substrat (nur wenige Sandkörner enthalten) bildet ein dicht gelagertes, zusammenhängendes Material, das durch zahlreiche, überwiegend biogene Hohlräume gegliedert ist. Die sehr dunkle Färbung wird durch einen hohen Anteil organischer Substanz verursacht. Nur dieses sehr humusreiche Material ist kalkarm, kalkfreies Substrat wie im hangenden Material (Probe 5) fehlt weitestgehend. Die helleren Partien des Materials sind dagegen sehr kalkreich. Je heller die Färbung des Substrats ist, umso weniger Humus ist enthalten. Die fleckige Verteilung der unterschiedlich gefärbten Substrate hat wohl mehrere Ursachen: Zum Einen lassen sich kleine Flecken als biogene Hohlraumfüllungen identifizieren, zum Anderen finden sich größere Materialbereiche mit scharfen Grenzen zum angrenzenden Substrat, die wahrscheinlich als Aggregate umgelagert sind. Besonders im rechten unteren Abschnitt des Dünnschliffs sind solche scharf begrenzten Aggregate zu sehen. Die Aggregate weisen keine Zurundungsmerkmale auf, die Hinweise auf ein Abrollen des Materials geben könnten. Möglicherweise deutet dies auf eine anthropogene Materialumlagerung (z.B. intentionelle Verfüllung einer Grube) hin. Das gesamte Material enthält zahlreiche Molluskenschalen und auch einige kleine Knochenfragmente.



## 2.6 Fotodokumentation

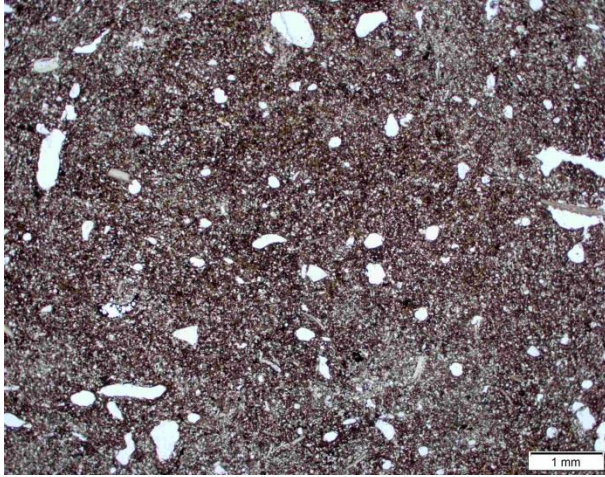

A: typisches Material, humos

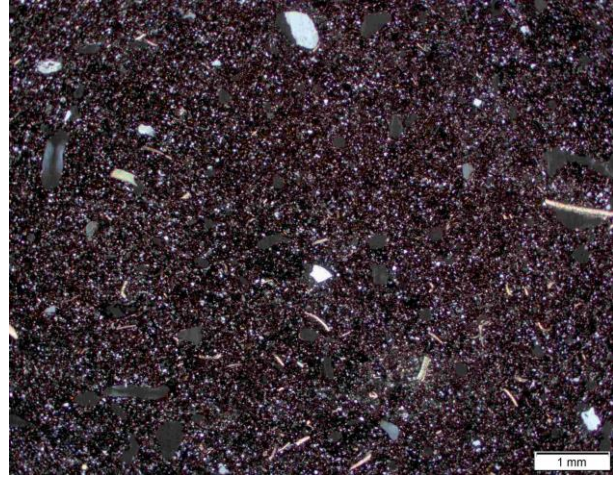

B: wie A, xpl

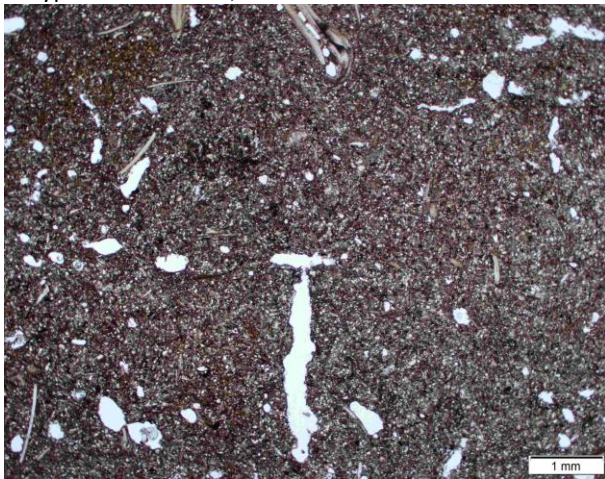

C: typisches Material (hell), kalkreich

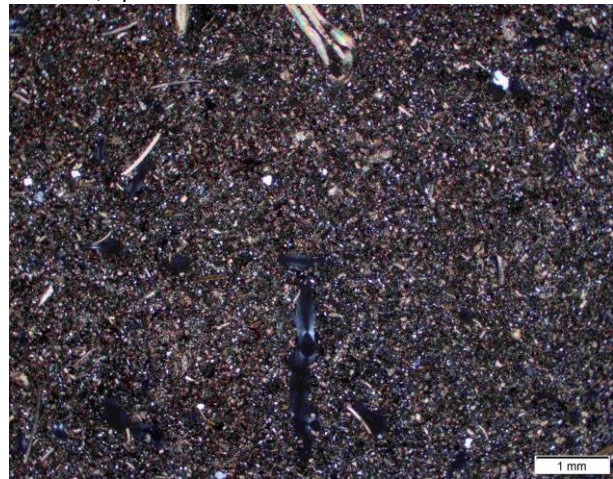

D: wie C, xpl

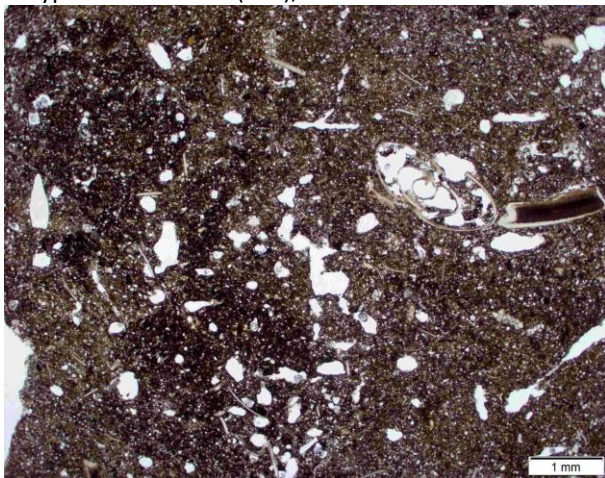

E: humoses (dunkles) Material als biogene Hohlraum-  
füllung in hellerer Materix

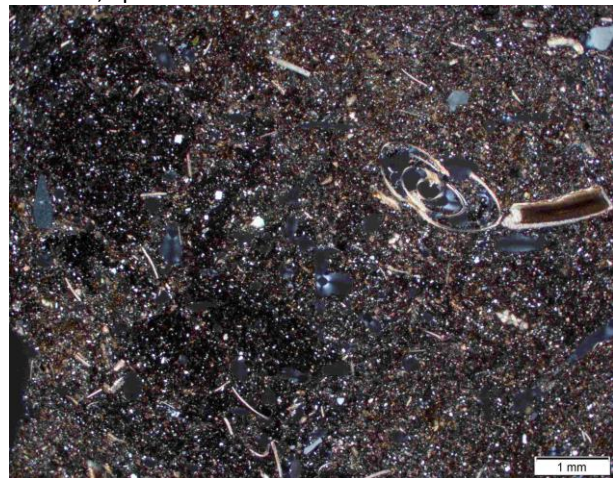

F: wie E, xpl



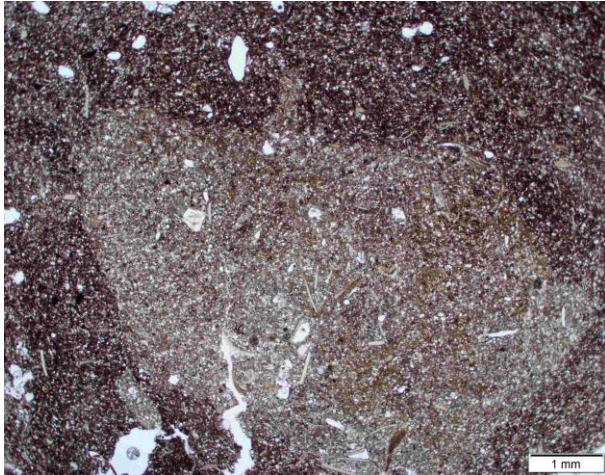

G: helles, kalkreiches Material als Aggregat in dunklerer Matrix

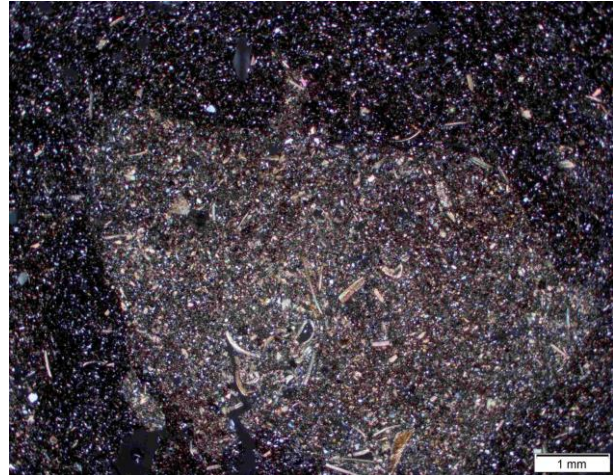

H: wie G, xpl

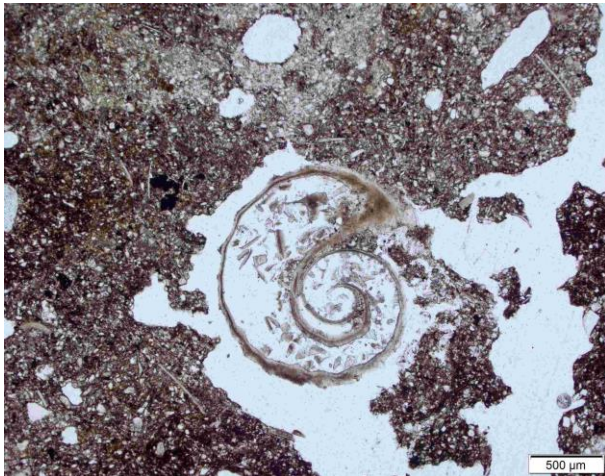

I: SchneckenSchale

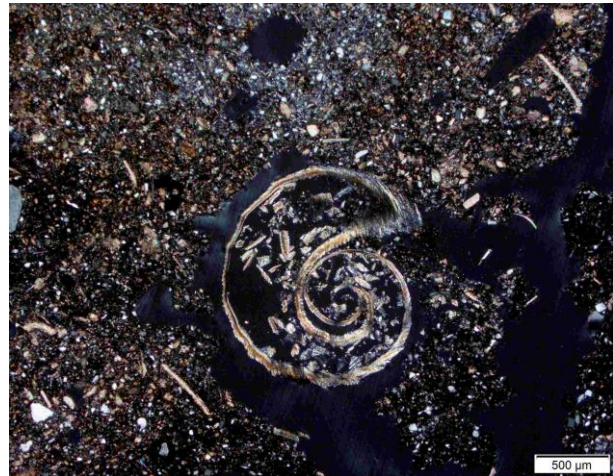

J: wie I, xpl

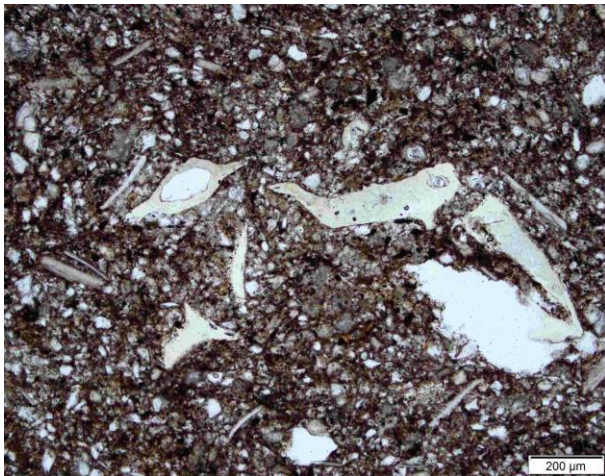

K: Knochenstückchen

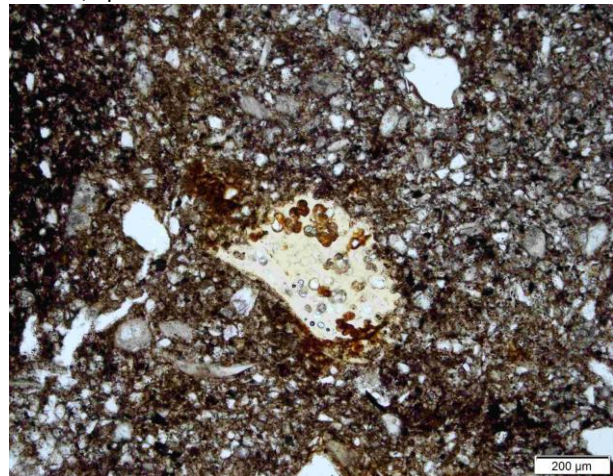

L: Knochenstückchen, angewittert



## 2.7 Beschreibung des Dünnschliffs Probe 7, Einheit M

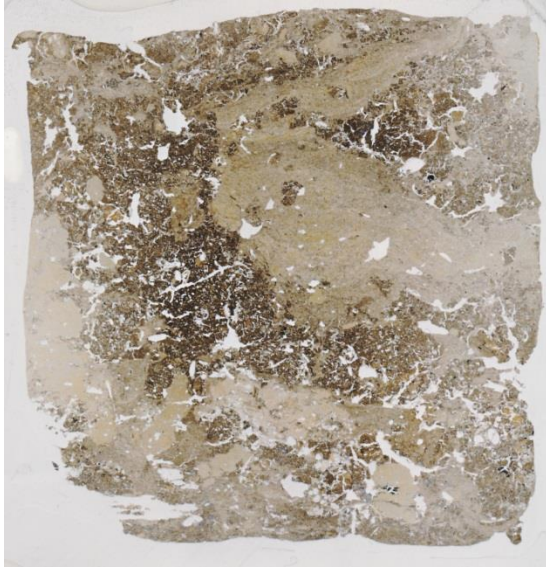

Abb. 5: Scan des Dünnschliffs Probe 7

Der Scan des Dünnschliffs (vgl. Abb. 5) zeigt sehr stark fleckiges Material. Die Fleckung entsteht durch die zusammenhängende Lagerung scharf begrenzter Aggregate unterschiedlicher Materialzusammensetzung. Die farbliche Variation ist dabei auf unterschiedliche Kalk- und Humusgehalte der Substrate zurückzuführen. Die scharfe Begrenzung und die fehlende Zurundung der Aggregate lassen, wie schon im zuvor beschriebenen Dünnschliff, möglicherweise auf eine intentionelle, anthropogene Umlagerung des Materials schließen. Zum Teil ist die Fleckung aber auch Resultat biogener Materialumlagerung. Das hell gefärbte Material ist sehr fein, dicht gelagert, arm an Hohlräumen und enthält kaum Molluskenschalen. Die Matrix ist kalkhaltig. Besonders im unteren Teil des Dünnschliffs findet sich aber auch helles Material, das eher kalkarm, teilweise auch kalkfrei ist. Ebenfalls im unteren Schliffabschnitt finden sich Materialpartien, die deutlich mehr Sand enthalten als alle zuvor beschriebenen Substrate. Die Bereiche mit dunklem Material sind viel lockerer gelagert, enthalten viele Hohlräume, zahlreiche Molluskenschalen und sowohl primäre (angewitterte) Kalksteinstücke als auch sekundäre, mikritische Kalkausfällungen.



## 2.8 Fotodokumentation

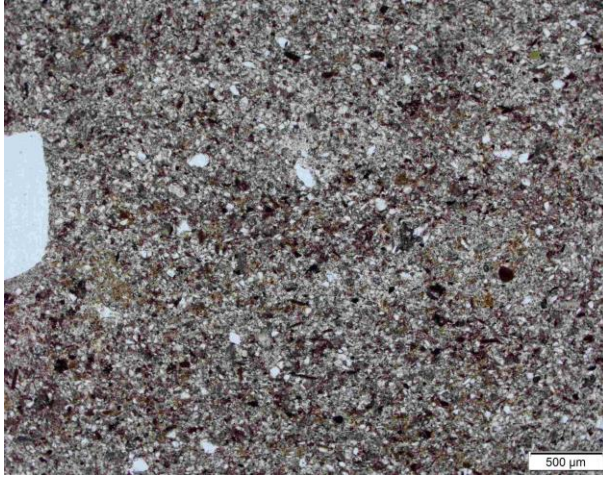

A: typisches Material, hell

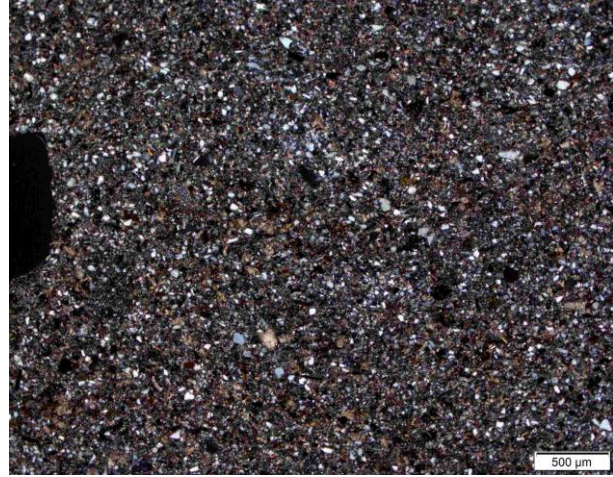

B: wie A, xpl

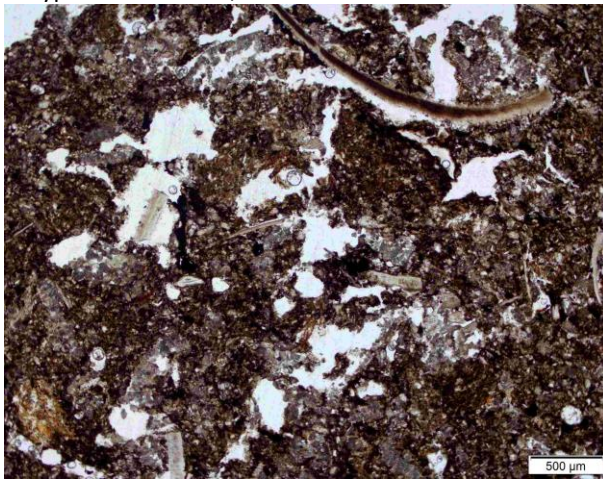

C: typisches Material, dunkel, locker gelagert, molluskenschalen- und kalkreich

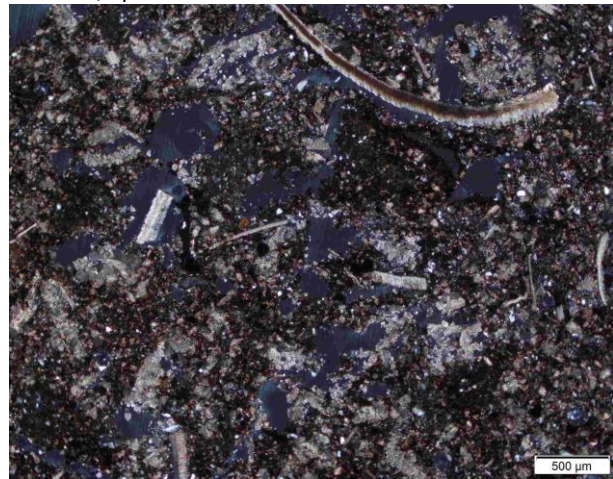

D: wie C, xpl

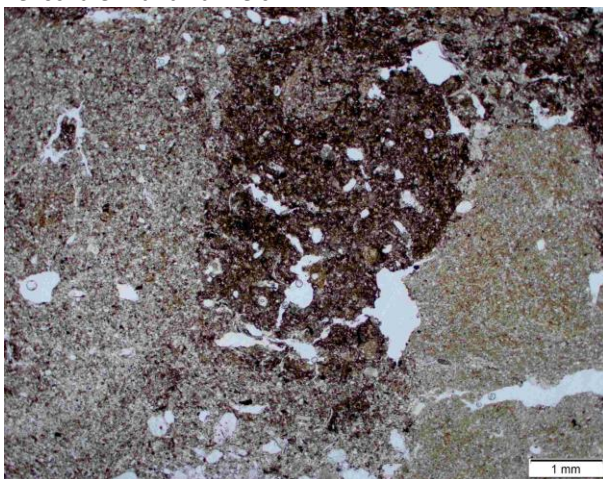

E: drei Materialtypen

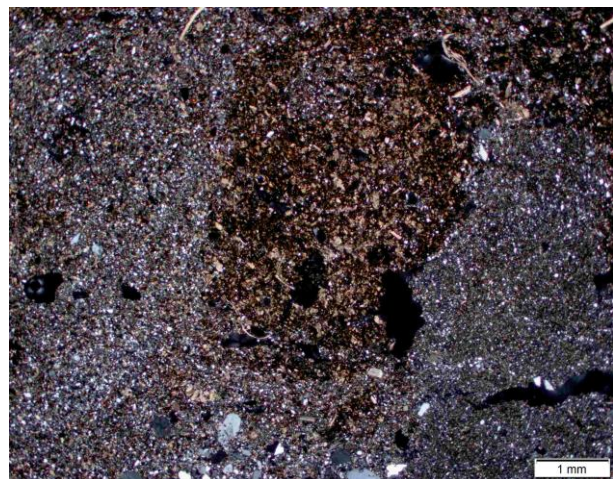

F: wie E, xpl



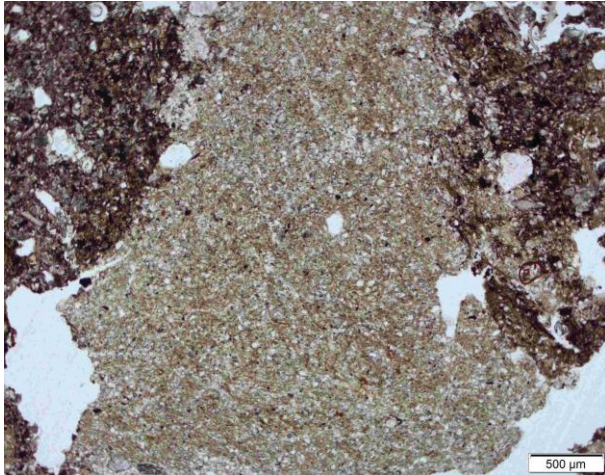

G: kalkarmes Material

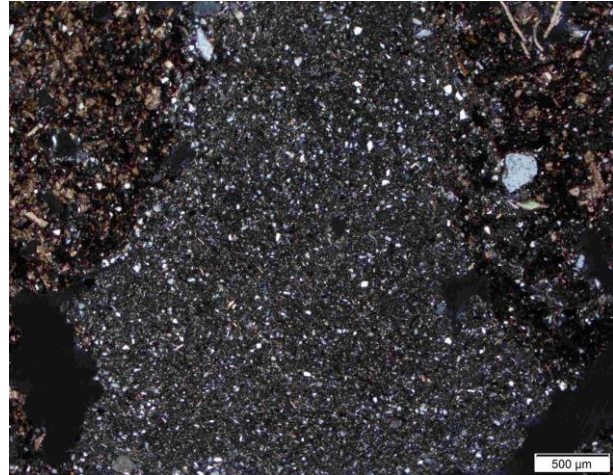

H: wie G, xpl

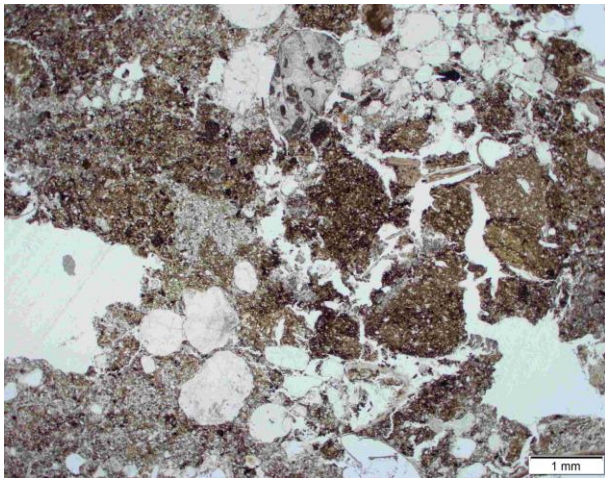

I: sandreiches Material im unteren Schliffteil

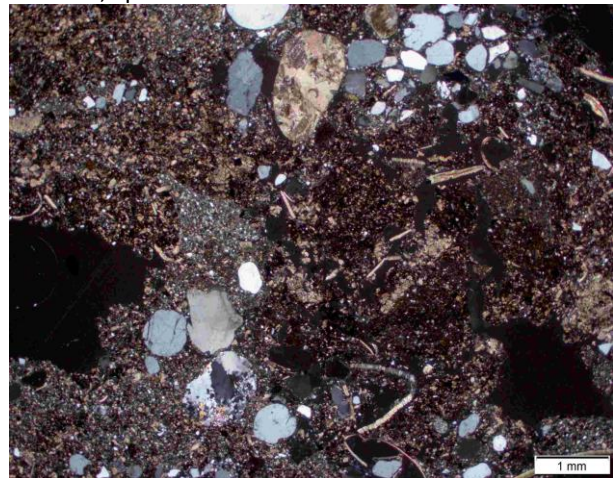

J: wie I, xpl

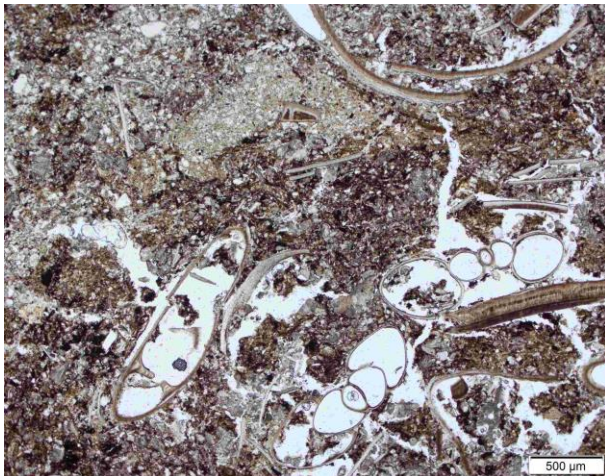

K: Molluskenschalen

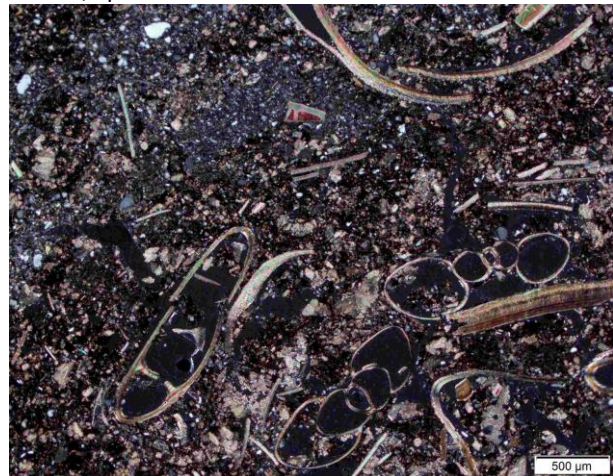

L: wie K, xpl



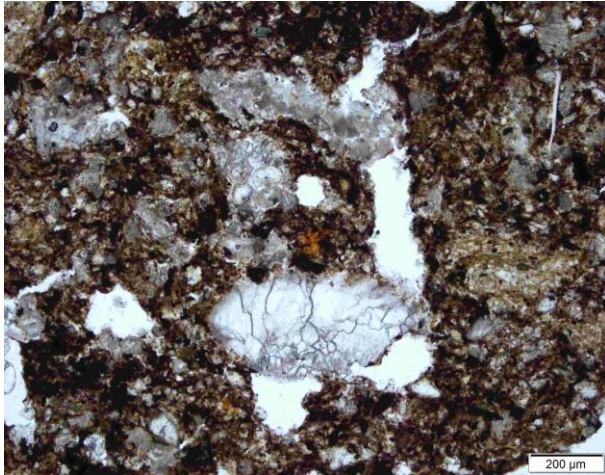

M: verwitternder Kalkstein

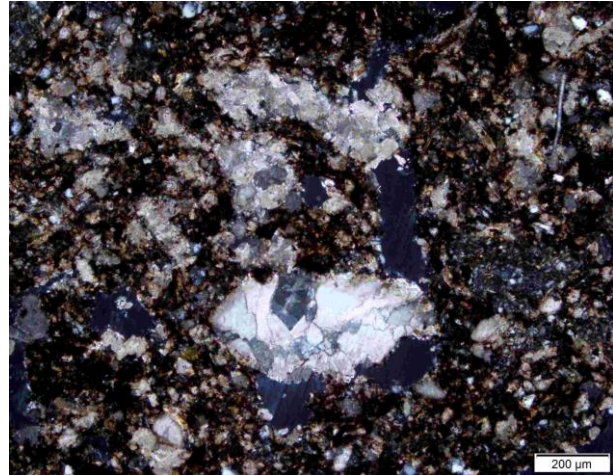

N: wie M, xpl

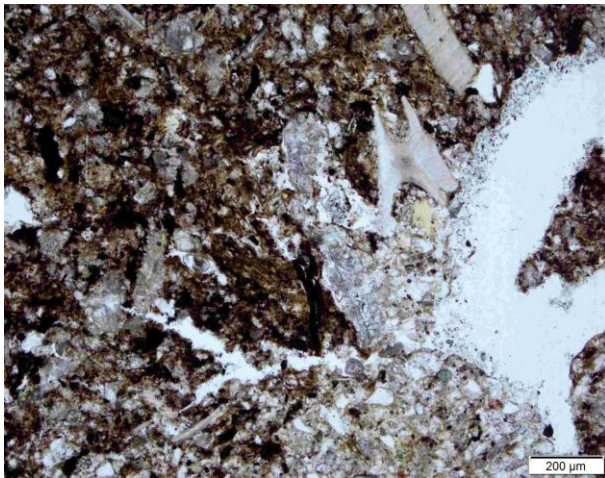

O: verwitterndes Molluskenschalenfragment

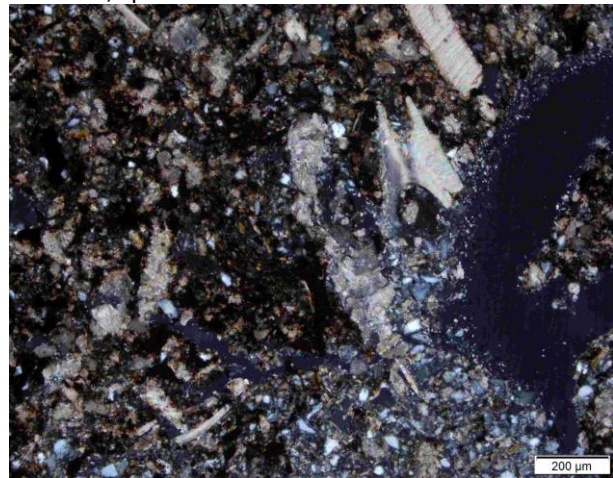

P: wie O, xpl

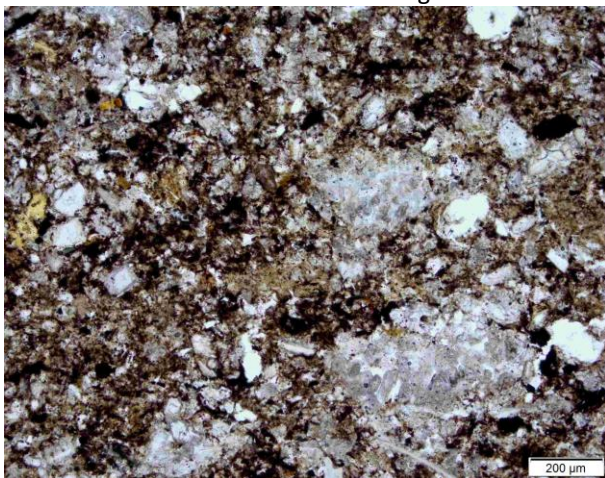

Q: humus- und calcitreiches Material

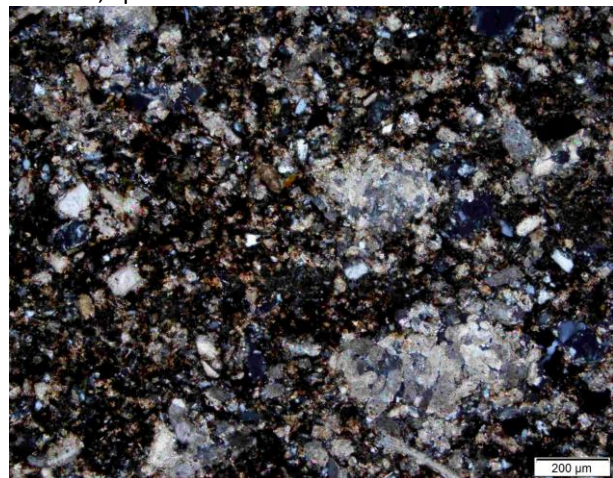

R: wie Q, xpl



### 3. Mikromorphologische Analysen im Bereich der Fundstelle KIE-16, Geoprofil 58, Proben 8-12

#### 3.1 Probennahme

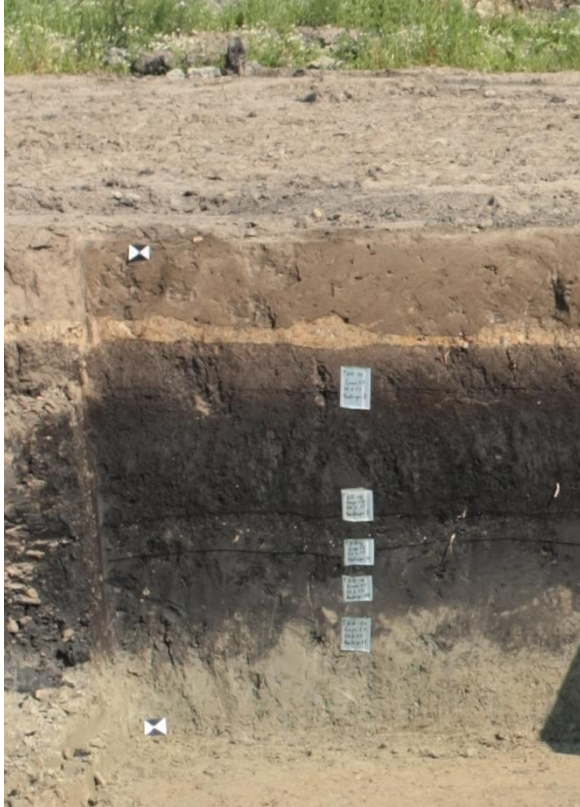

Abb. 6: Entnahmesituation der Dünnschliffproben 8-12 (von oben nach unten)

#### 3.2 Fragestellung: Charakterisierung der Sedimente und ihrer Genese – Vergleich mit Dünnschliffen 5-7

### 3.3 Beschreibung des Dünnschliffs Probe 8, Einheit C/D

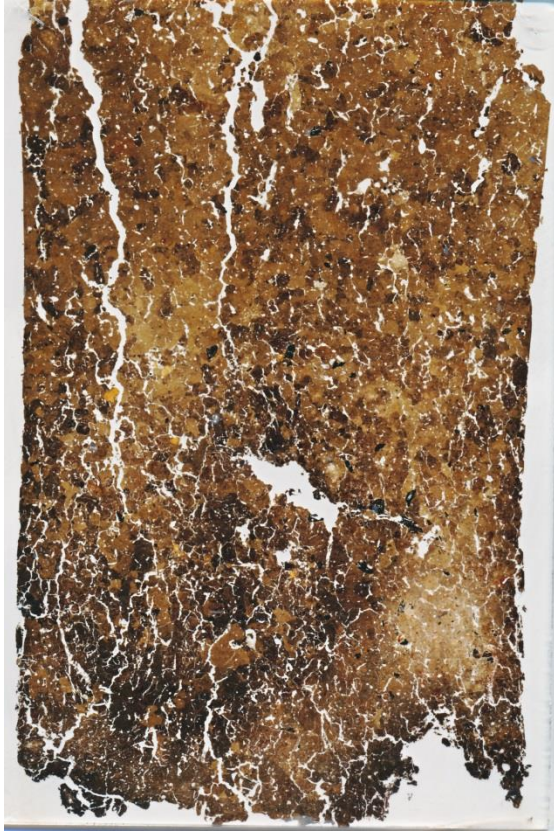

Abb. 7: Scan des Dünnschliffs Probe 8

Der Scan des Dünnschliffs (vgl. Abb. 7) zeigt ein extrem kleinteiliges Nebeneinander unterschiedlich gefärbten Materials. Insgesamt zeichnet sich das Material durch eine unterschiedlich dunkle, braune Färbung aus, in die aber zahlreiche fast schwarze Materialflecken eingeschaltet sind. Der Anteil des sehr dunklen Materials ist im unteren Drittel des Dünnschliffs höher als in den oberen Bereichen, jedoch lässt sich keine Substratgrenze erkennen. Das Substrat ist durch zahlreiche Risse unterschiedlicher Größe gegliedert. Weiterhin finden sich biogene Hohlräume. Die starke Fleckung ist ebenfalls Ergebnis bioturbater Materialüberformung: Das kleinteilige Nebeneinander unterschiedlicher Substrate besteht aus unzähligen biogenen Hohlraumfüllungen. Das Material ist im gesamten Schliff kalkfrei und sehr feinkörnig (nur wenige Sandkörner enthalten). Das dunkle Substrat erhält seine Färbung durch einen hohen Anteil amorpher organischer Substanz. Darüber hinaus finden sich im beprobten Material zahlreiche größere organische Reste (Wurzeln, nicht näher bestimmbares pflanzliches Material), Sklerotien und Holzkohle. Vereinzelt treten Eisenoxidausfällungen an Hohlraumrändern auf.



### 3.4 Fotodokumentation

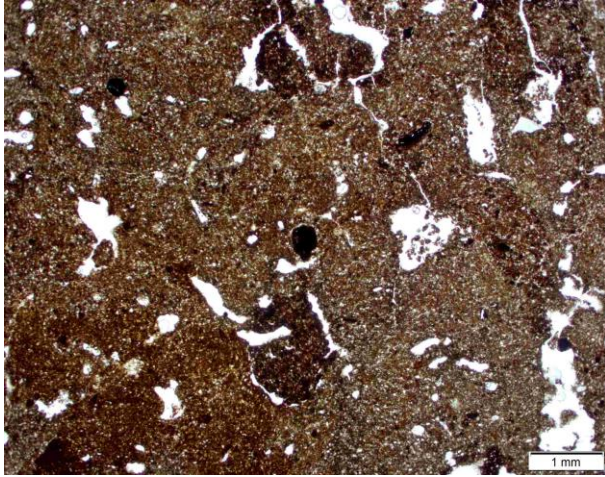

A: typisches Material im oberen Schliffabschnitt

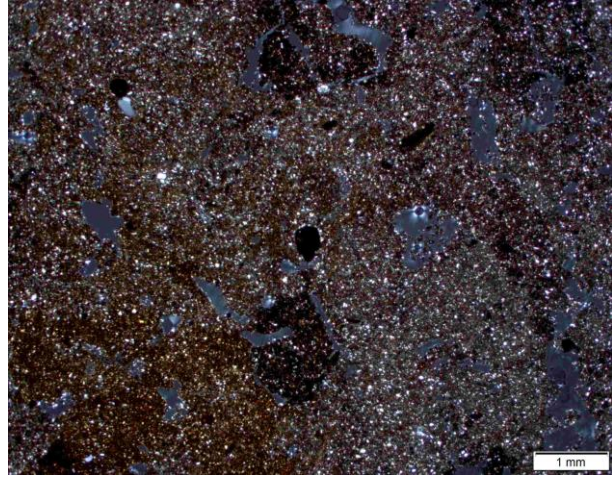

B: wie A, xpl

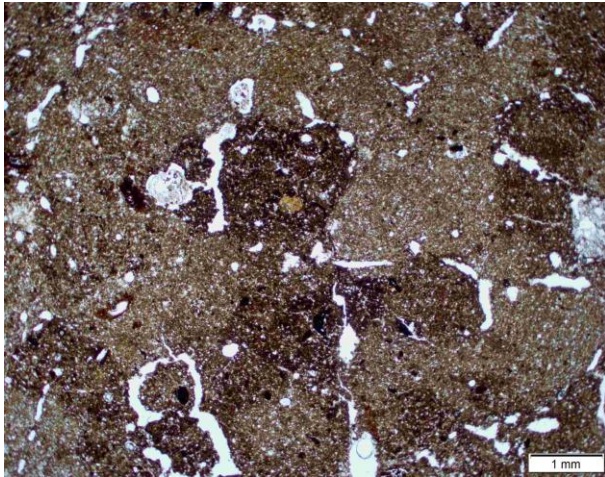

C: typisches Material im oberen Schliffabschnitt

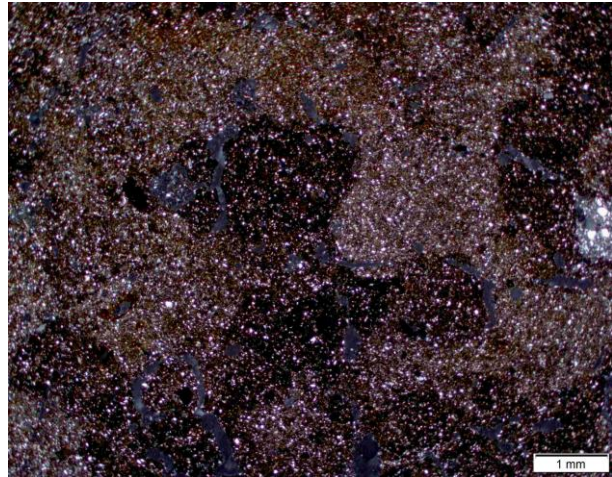

D: wie C, xpl

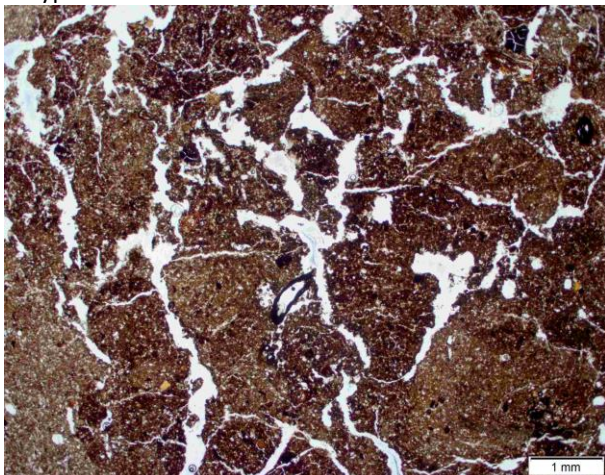

E: typisches Material im unteren Schliffabschnitt

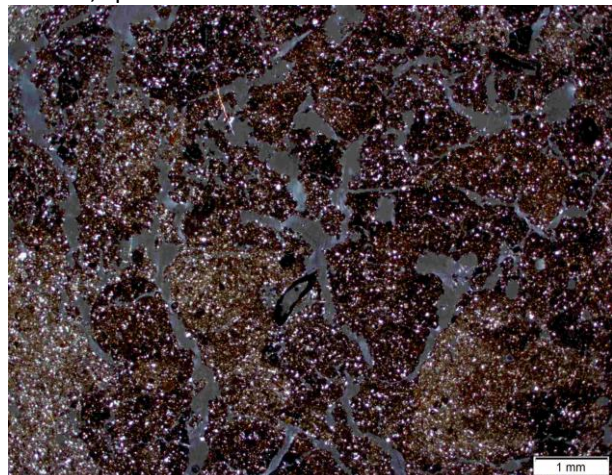

F: wie E, xpl



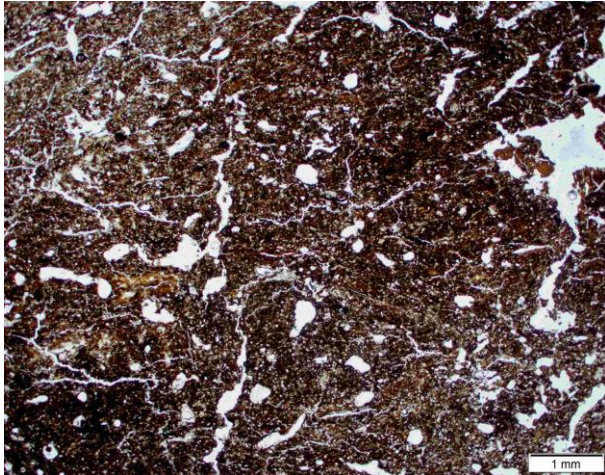

G: typisches Material im unteren Schliffabschnitt

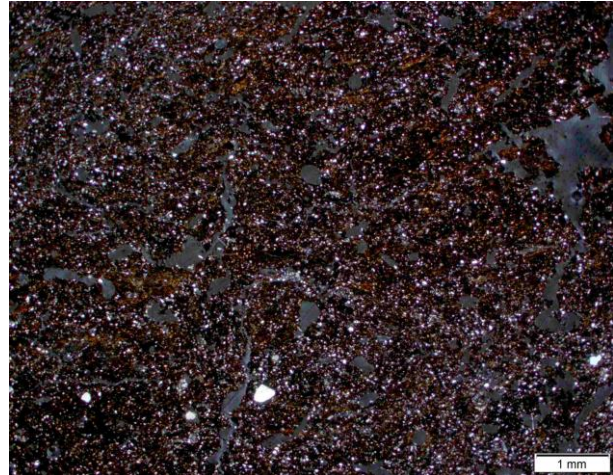

H: wie G, xpl

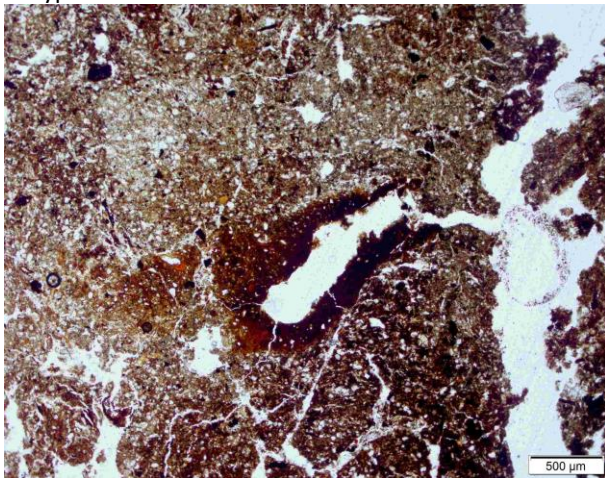

I: Eisenoxidcoating

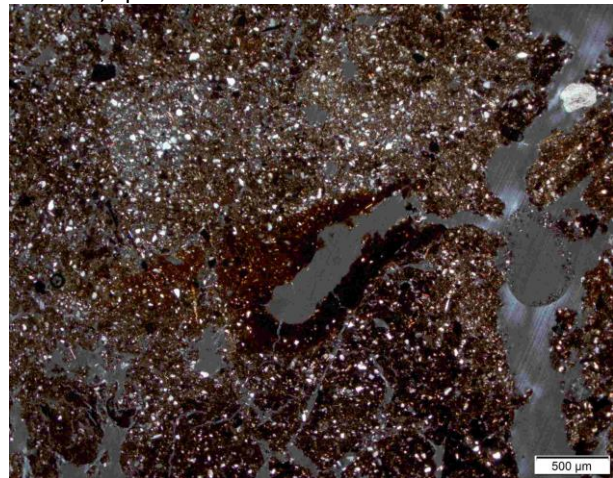

J: wie I, xpl

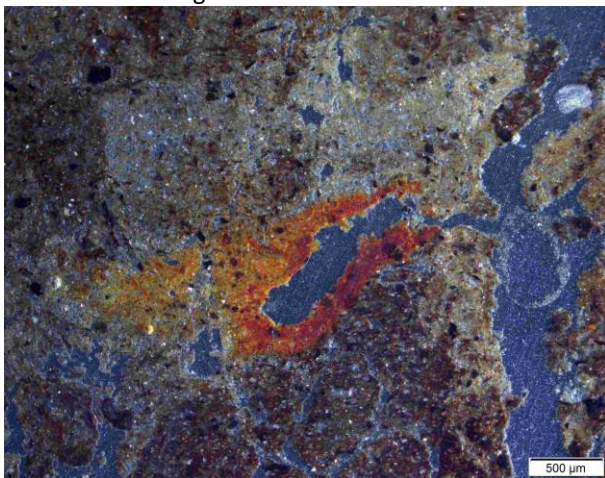

K: wie I, oil

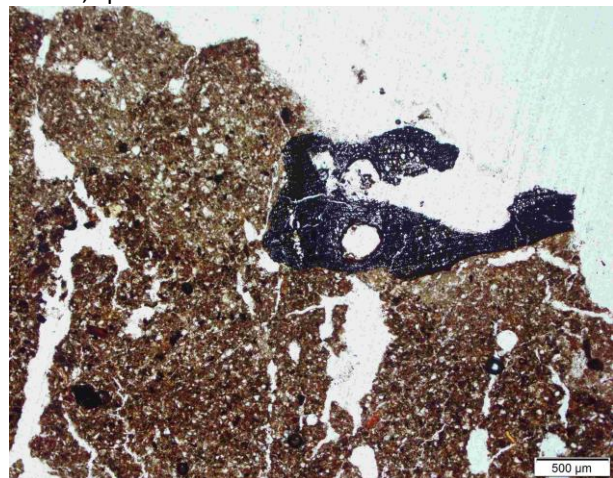

L: Holzkohle



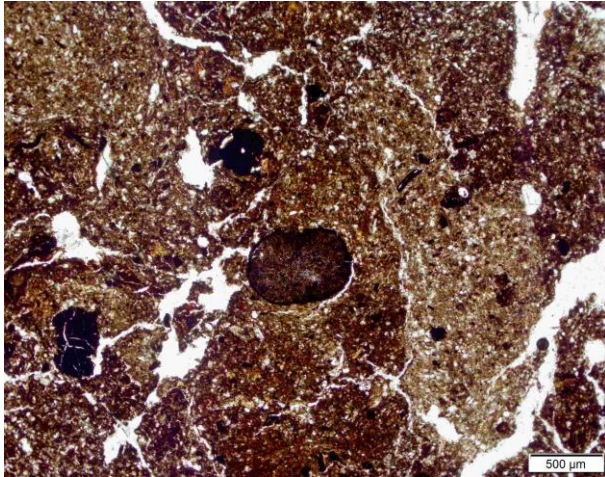

M: Sklerotium

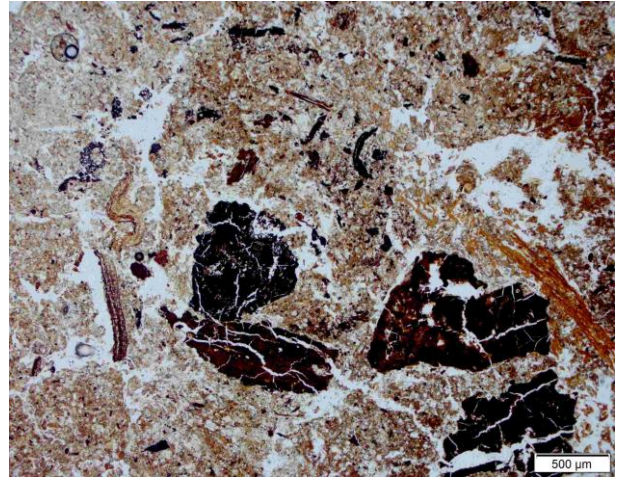

N: pflanzliches Material

### 3.5 Beschreibung des Dünnschliffs Probe 9, Einheit D/E

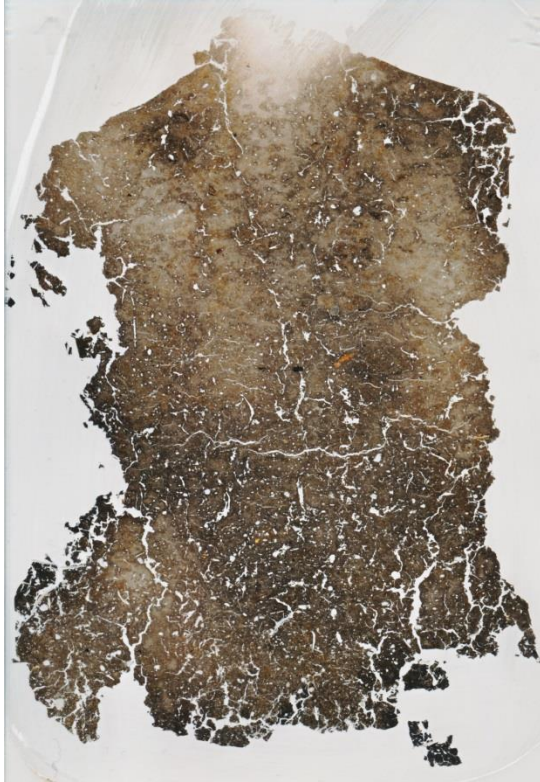

Abb. 8: Scan des Dünnschliffs Probe 9

Der Scan des Dünnschliffs (Abb. 8) zeigt hell- und dunkelgrau geflecktes, feinkörniges Material. Im oberen Schliffteil ist das Substrat sehr dicht gelagert, im unteren Teil gliedern zahlreiche Hohlräume das Material. Die dunkle Färbung, verursacht durch einen erhöhten Gehalt an organischer Substanz, ist im unteren Teil des Dünnschliffs stärker ausgeprägt, findet sich jedoch in kleineren Mengen auch im oberen Schliffabschnitt. Dort ist das Substrat insgesamt kalkfrei und enthält Reste pflanzlichen Materials. Im mittleren Schliffabschnitt treten zahlreiche biogene Hohlraumfüllungen mit kalkhaltigem Substrat auf, das im gesamten unteren Schliffabschnitt das Substrat bildet. Dort finden sich jedoch ebenfalls biogene Hohlraumfüllungen, in dem Fall aus kalkfreiem Material. Eine Substratgrenze kann nicht festgelegt werden, der Übergang von kalkfreiem zu kalkhaltigem Material ist fließend. Molluskenschalen sind besonders im unteren Schliffteil häufig, die meisten Knochenstückchen finden sich im mittleren Schliffabschnitt. Vereinzelt treten calcitische Wurzelausscheidungen an Hohlraumrändern in Erscheinung.



### 3.6 Fotodokumentation

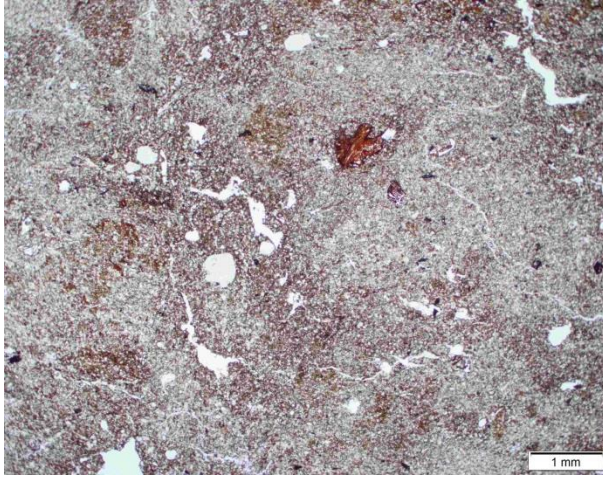

A: typisches Material im oberen Schliffabschnitt

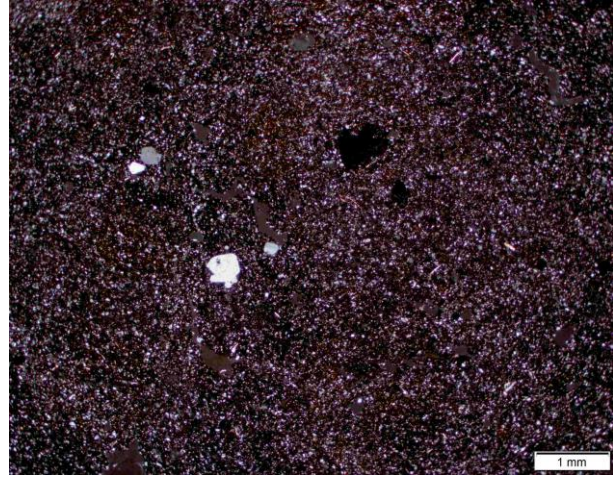

B: wie A, xpl

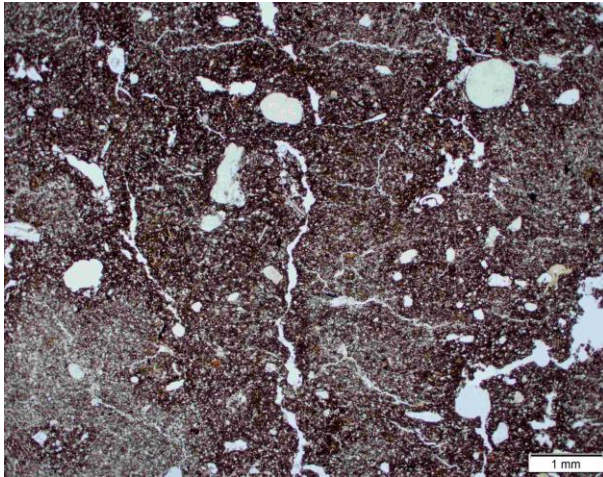

C: typisches Material im mittleren Schliffabschnitt

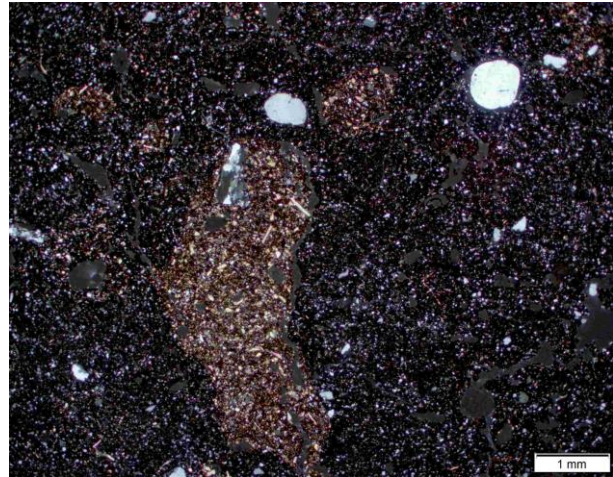

D: wie C, xpl

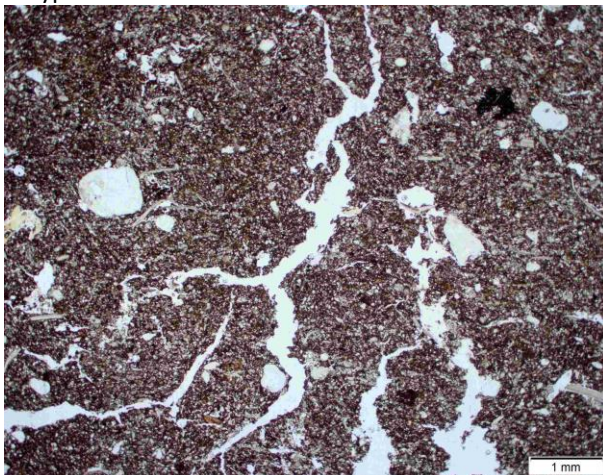

E: typisches Material im unteren Schliffabschnitt

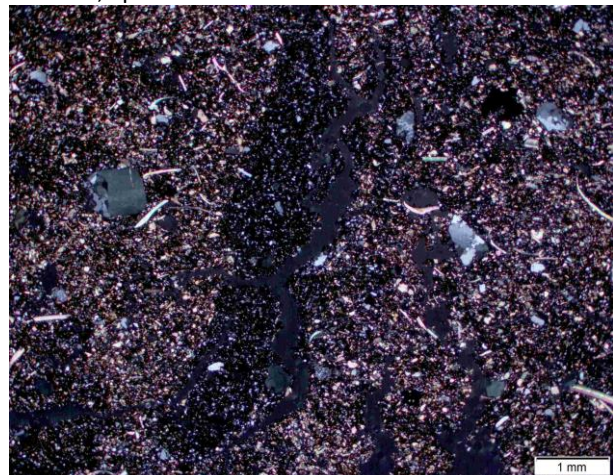

F: wie E, xpl



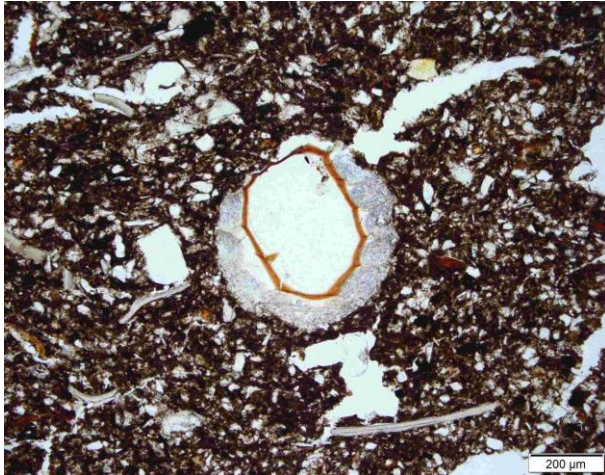

G: calcitisches coating

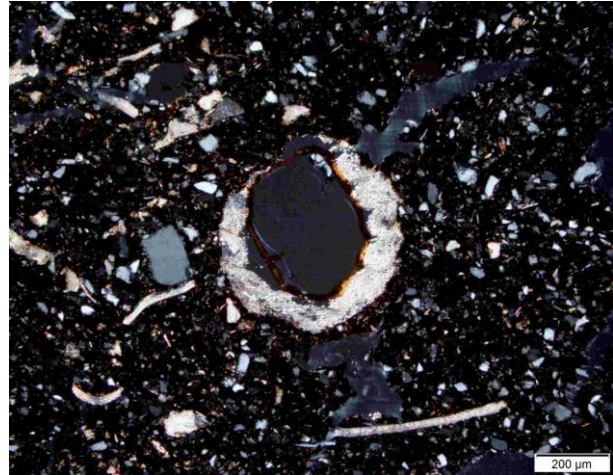

H: wie G, xpl

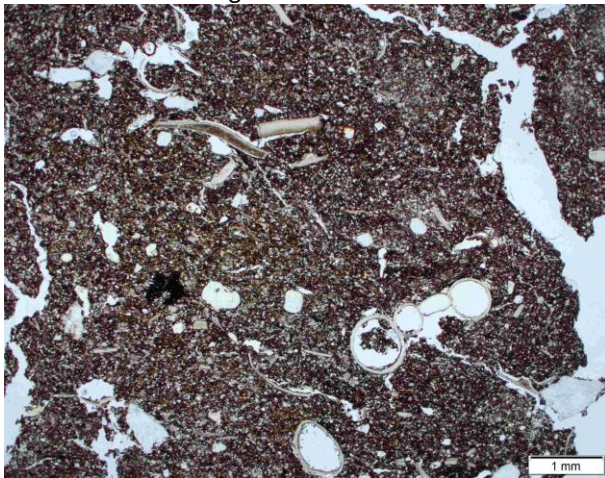

I: Schnecken-schalen

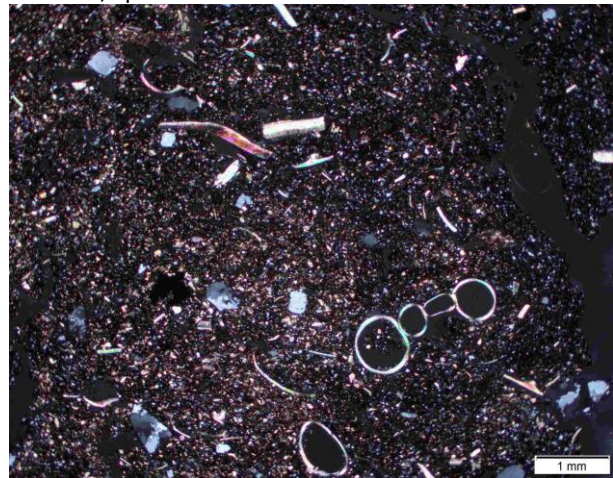

J: wie I, xpl

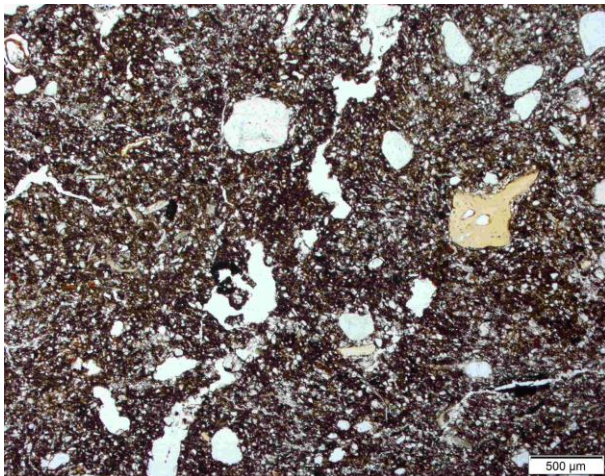

K: Knochenstück

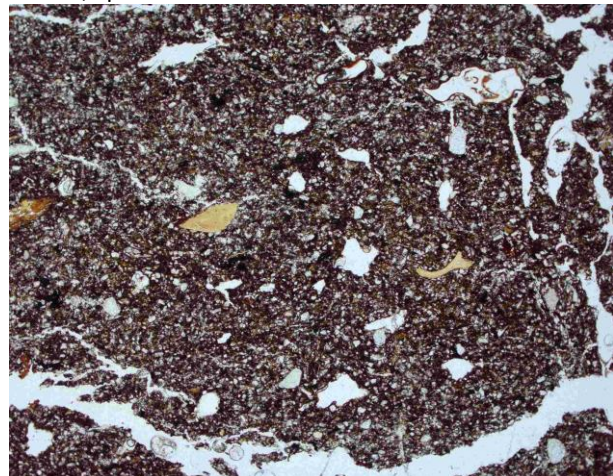

L: Knochenstückchen



### 3.7 Beschreibung des Dünnschliffs Probe 10, Einheit E/F

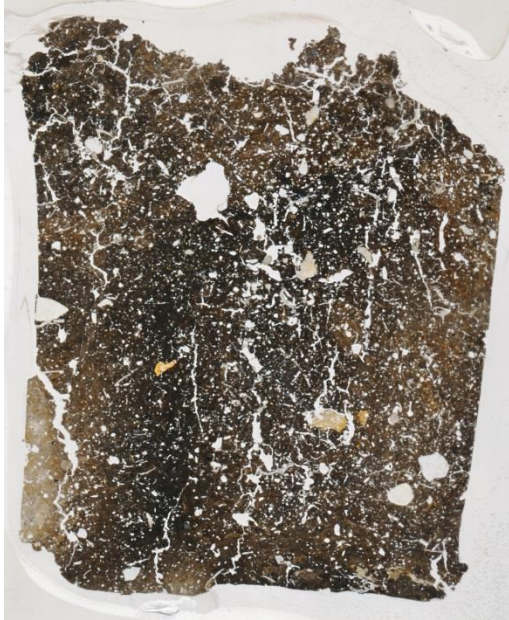

Abb. 9: Scan des Dünnschliffs Probe 10

Der Scan des Dünnschliffs (Abb. 9) zeigt überwiegend feinkörniges Material, das zusammenhängend (nicht aggregiert) gelagert und von zahllosen Hohlräumen durchbrochen ist. Der hohe Gehalt an amorpher organischer Substanz färbt das Material im gesamten Dünnschliff sehr dunkel. Lediglich im unteren Schliffabschnitt findet sich fleckenhaft auch humusärmeres Substrat. In dem feinkörnigen Substrat lassen sich bereits mit bloßem Auge größere Partikel erkennen. Dabei handelt es sich um Gesteins- und Knochenstücke sowie auch um Molluskenschalen. Das Material ist im oberen Schliffteil kalkhaltig. Mit zunehmender Tiefe verringert sich der Kalkgehalt in der Matrix, so dass im unteren Schliffteil das Substrat weitgehend kalkfrei ist (Matrix), jedoch Molluskenschalen, verwitterte Kalksteinstückchen und biogene Einmischungen kalkhaltigen Materials enthält.



### 3.8 Fotodokumentation

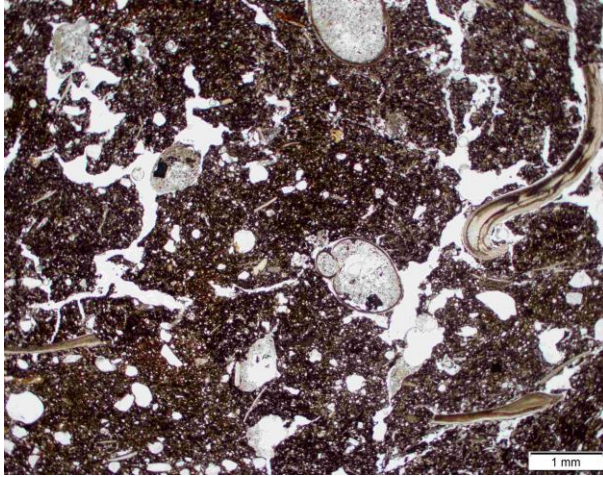

A: typisches Material im oberen Schliffabschnitt

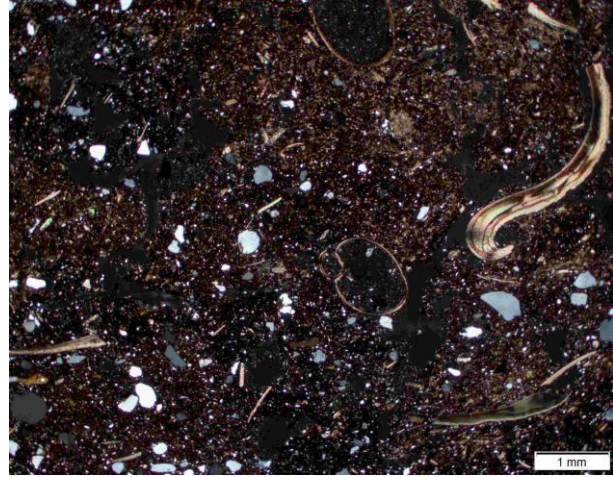

B: wie A, xpl

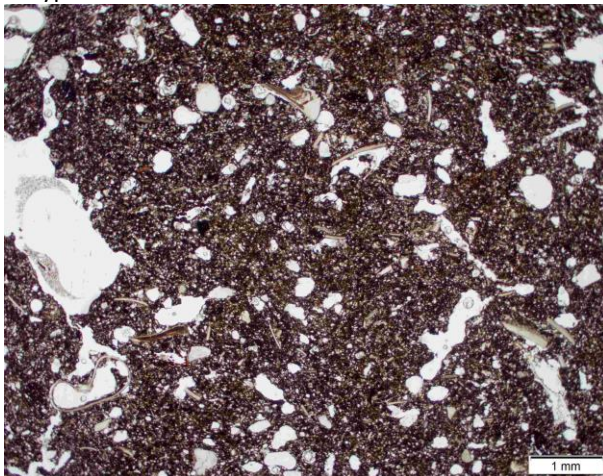

C: typisches Material im mittleren Schliffabschnitt

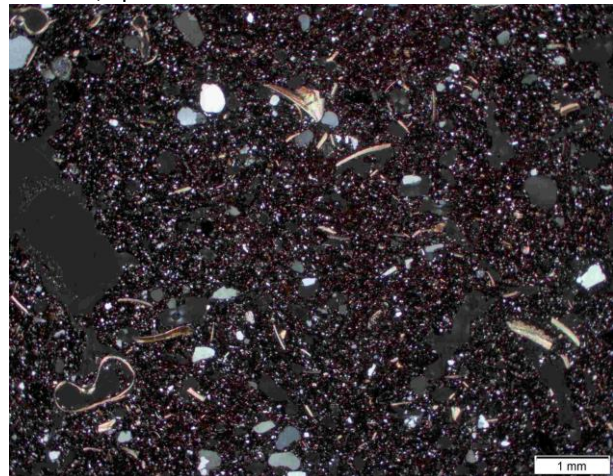

D: wie C, xpl

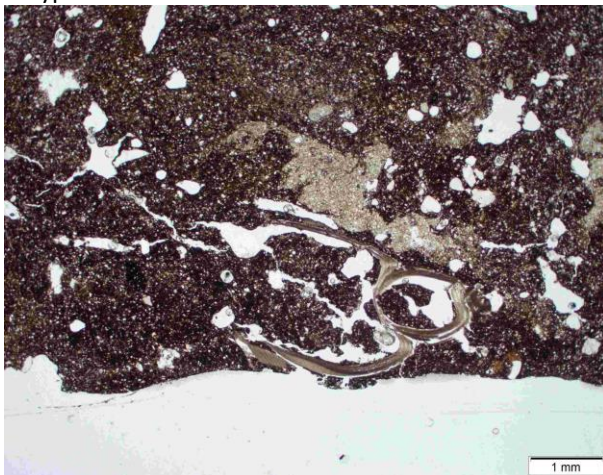

E: humusarmes Material im unteren Schliffabschnitt

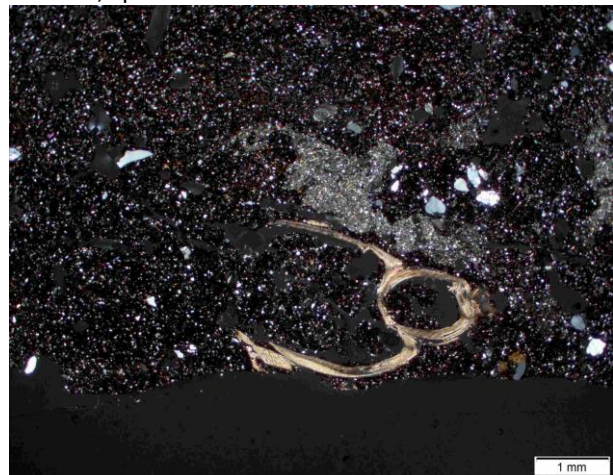

F: wie E, xpl



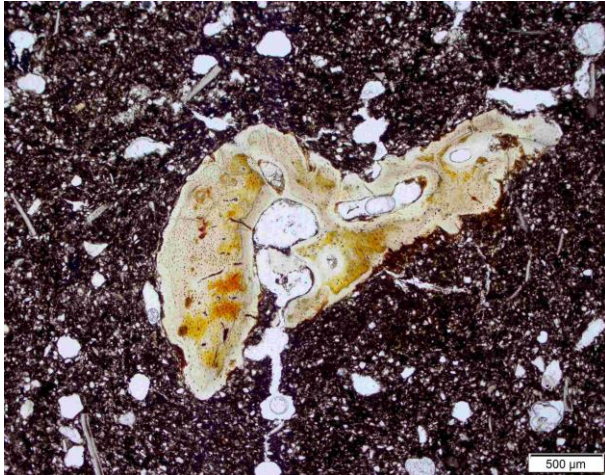

G: verwittertes Knochenstück

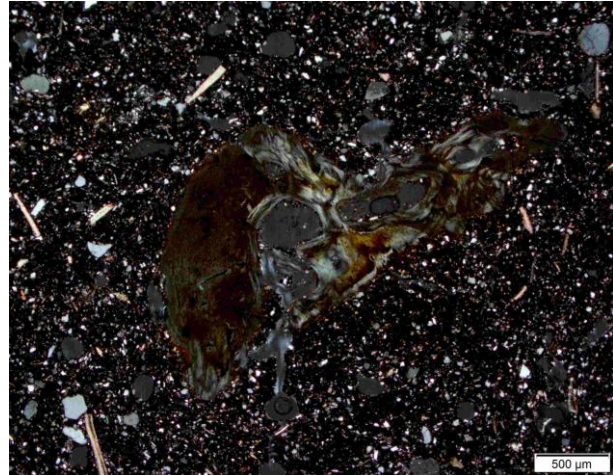

H: wie G, xpl

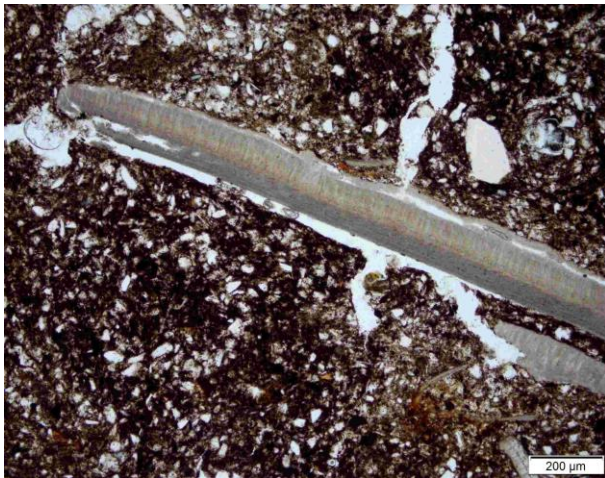

I: angewitterte Molluskenschale

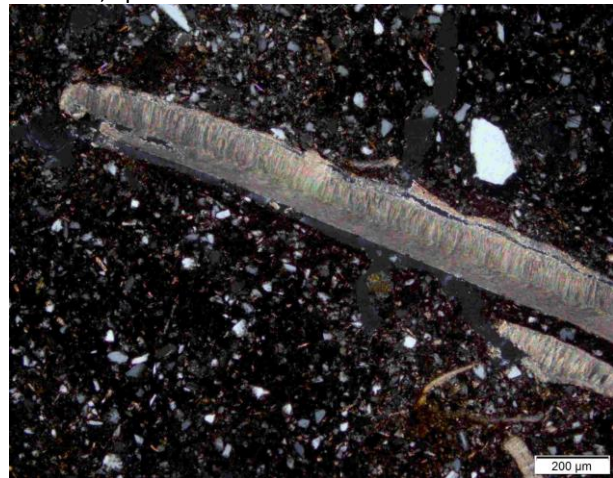

J: wie I, xpl

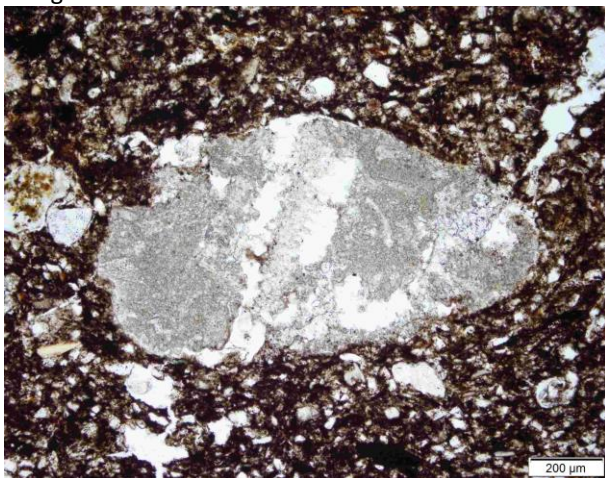

K: verwittertes Kalksteinstück

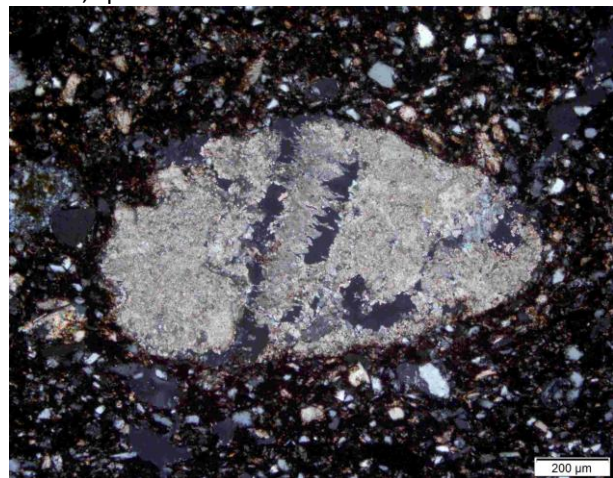

L: wie K, xpl



### 3.9 Beschreibung des Dünnschliffs Probe 11, Einheiten F/G

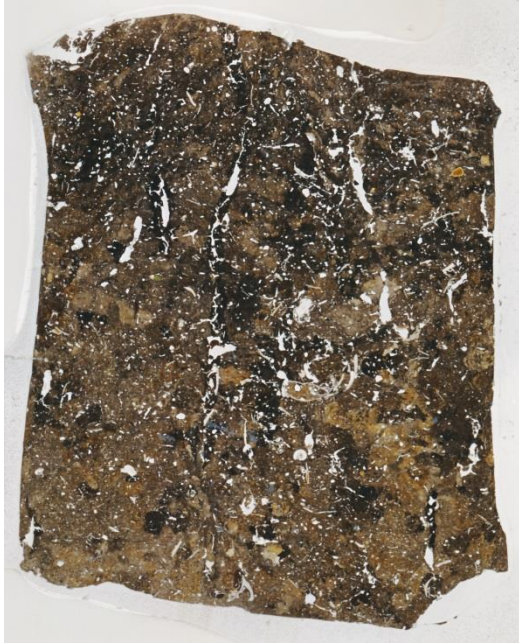

Abb. 10: Scan des Dünnschliffs Probe 11

Das Material im Scan des Dünnschliffs (Abb. 10) zeigt ein sehr fleckiges Erscheinungsbild: dunkles, humoses Material ist vor allem in der oberen Schliffhälfte stärker repräsentiert. Auch ist die Anzahl der Hohlräume hier größer als in der unteren Schliffhälfte. Die Fleckigkeit wird vor allem durch die bioturbate Verschleppung von unterschiedlichen Substraten erzeugt. Heller gefärbtes Material nimmt mit der Tiefe im Anteil zu. Da es sich bei diesem hellen Material um stark kalkhaltiges Substrat handelt, steigt auch der Carbonatgehalt mit zunehmender Tiefe an. Gleichwohl ist auch der obere Schliffabschnitt nicht kalkfrei: Eingemischtes Substrat mit kalkhaltiger Matrix, Molluskenschalen, Knochenstückchen und kleine Kalksteinstückchen sind auch im oberen Schliffabschnitt präsent. In der Probe wurde wahrscheinlich der Übergang zum kalkhaltigen Material der Einheit G erfasst, da das Substrat der Einheit F eher kalkarm und dunkler gefärbt ist (überwiegend im oberen Schliffteil).



### 3.10 Fotodokumentation

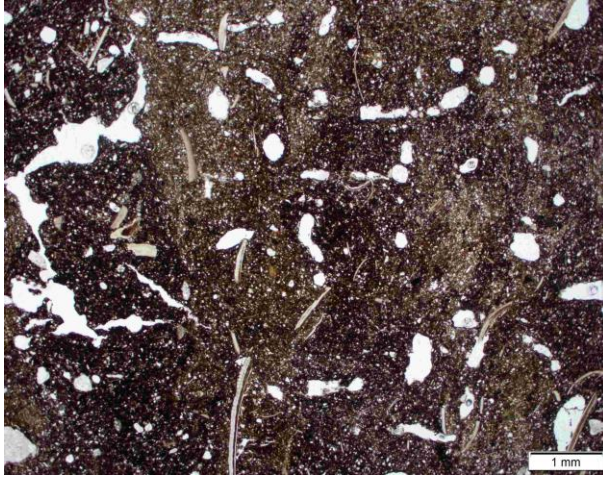

A: typisches Material im oberen Schliffabschnitt

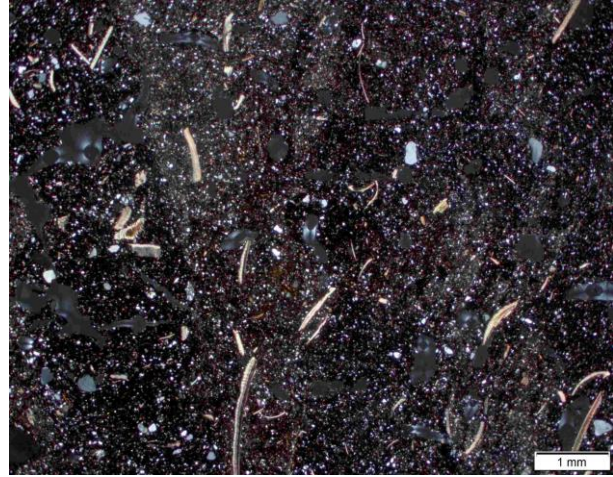

B: wie A, xpl

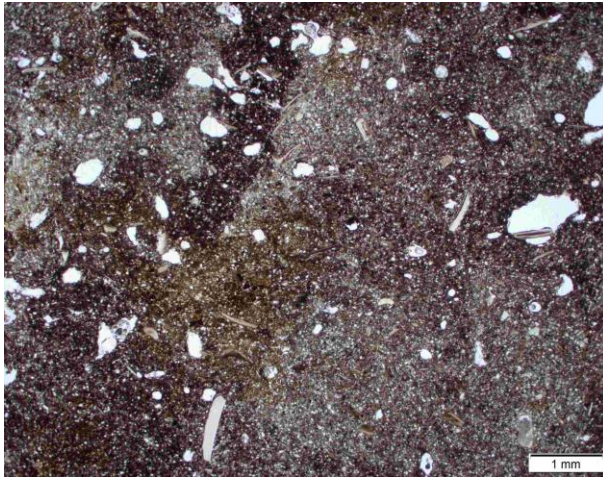

C: typisches Material im mittleren Schliffabschnitt

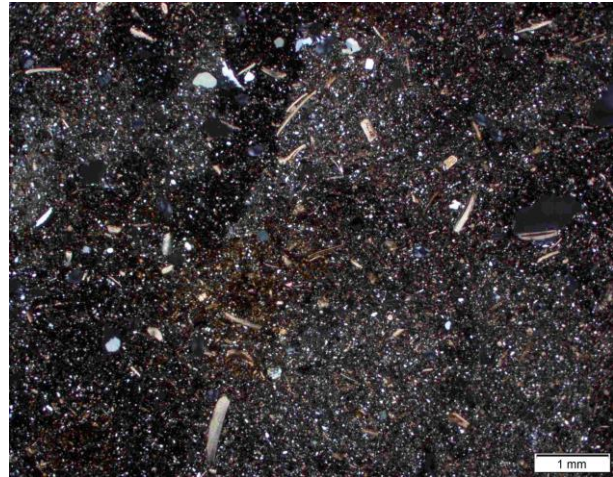

D: wie C, xpl

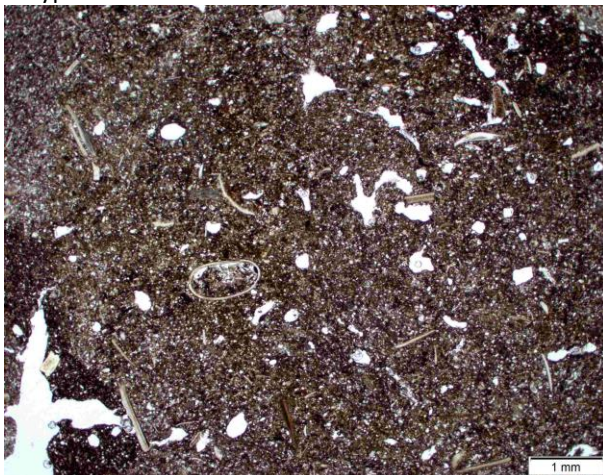

E: typisches Material im unteren Schliffabschnitt

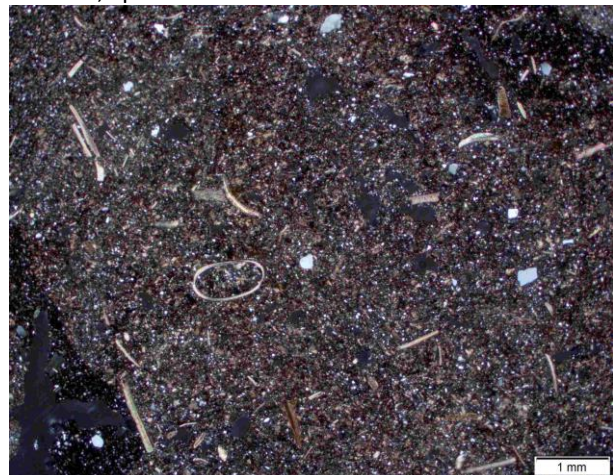

F: wie E, xpl



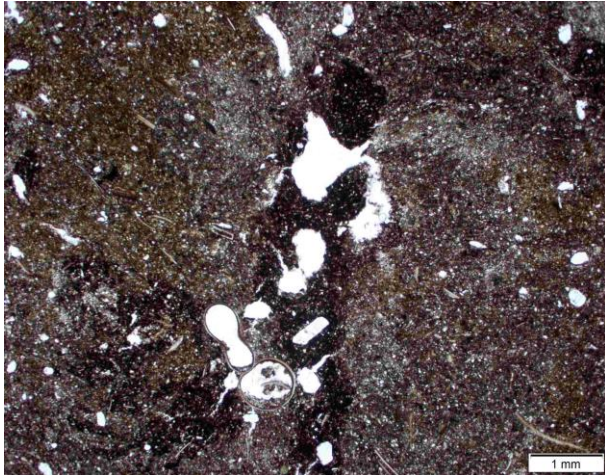

G: humose Hohlraumfüllung im unteren Schliffabschnitt

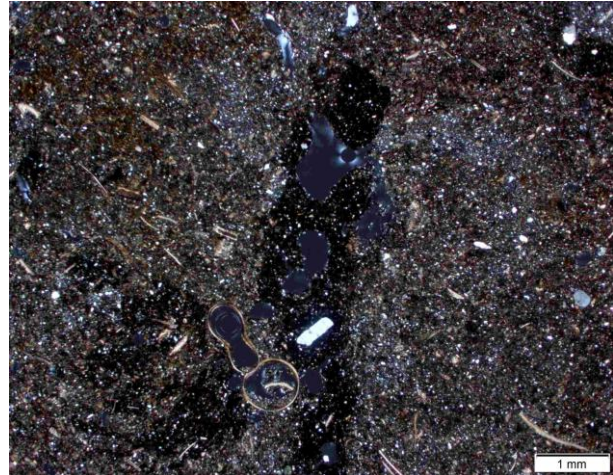

H: wie G, xpl

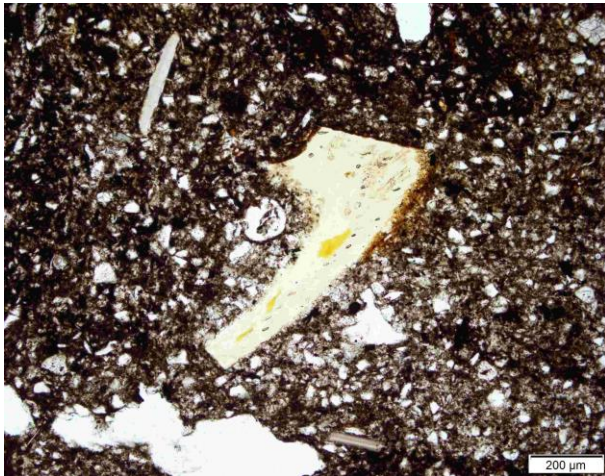

I: Knochenstück

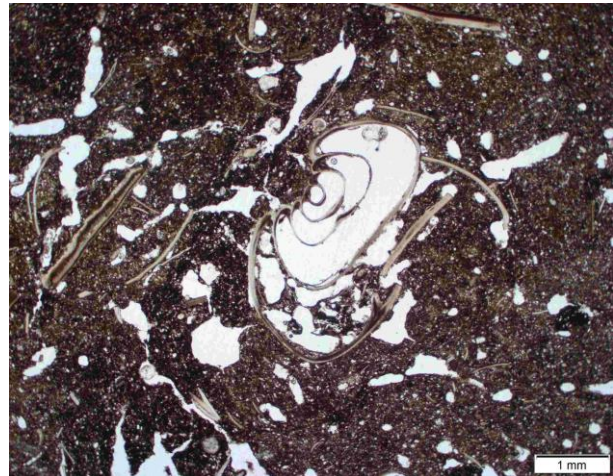

J: Schneckenschale

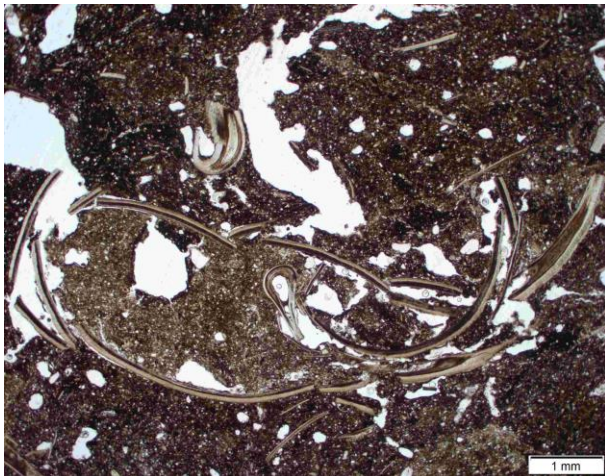

K: zerdrückte Schneckenschale

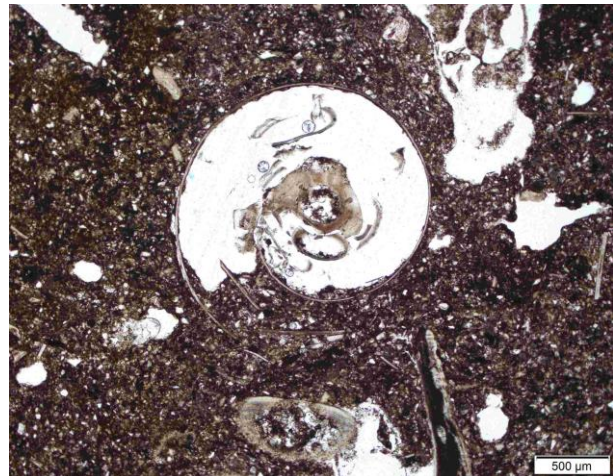

L: Schneckenschale



### 3.11 Beschreibung des Dünnschliffs Probe 12, Einheit G/H

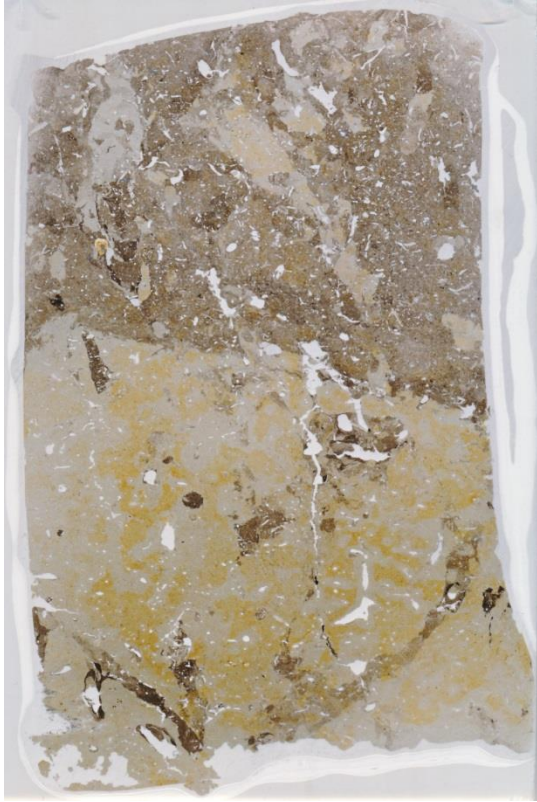

Abb. 11: Scan des Dünnschliffs Probe 12

Der Scan des Dünnschliffs (Abb. 11) zeigt eine deutliche Zweiteilung des beprobten Materials mit einer scharfen Grenze. Dennoch ist sowohl im oberen als auch im unteren Schliffabschnitt Material aus dem jeweilig anderen Abschnitt zu erkennen. Das dunkel gefärbte Material weist einen sehr hohen Kalkgehalt auf. Dieser besteht aus mehreren Komponenten: größeren Kalksteinstückchen, Molluskenschalen und Sekundärcarbonatausfällungen. Das heller gefärbte Material ist insgesamt feinkörniger, weil hier die größeren Kalksteinstückchen und Molluskenschalen weitgehend fehlen (außer biogene Einmischung), ist dichter gelagert und kalkärmer, wenngleich auch hier Sekundärcarbonatausfällungen auftreten. Auffällig sind im hellen Material außerdem die fleckenhaften Eisenoxidimprägnierungen der Matrix. Die Grenze zwischen den beiden Substraten im Schliff ist extrem scharf ausgebildet. Während das Vorkommen des dunklen, kalkreichen Materials im unteren Schliffabschnitt ausschließlich Folge bioturbater Aktivität ist, gilt dies für das helle, kalkarme Substrat im oberen Schliffabschnitt nicht. Zwar sind auch hier biogene Hohlraumfüllungen mit hellem Material zu finden, es gibt allerdings auch größere, fetzenartige Einschaltungen, die vielleicht auf anthropogen verursachte Materialumlagerungen zurückzuführen sind. Die extrem scharfe Sedimentgrenze würde die These einer nicht rein natürlich entstandenen Sedimentschichtung unterstützen.



### 3.12 Fotodokumentation

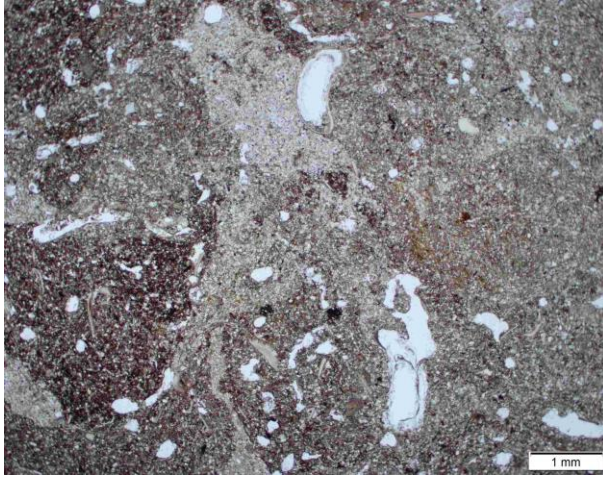

A: typisches Material im oberen Schliffabschnitt

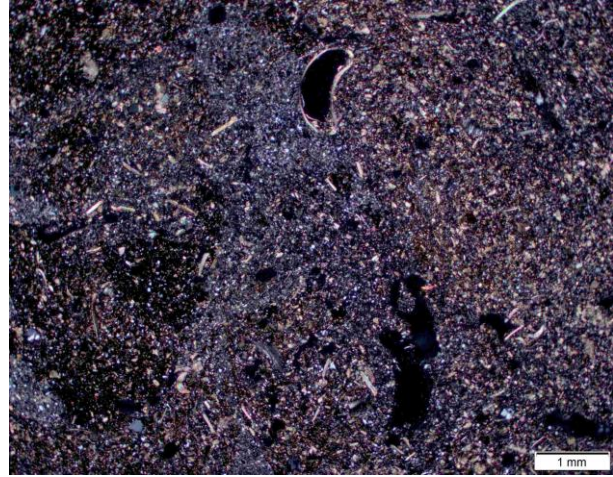

B: wie A, xpl

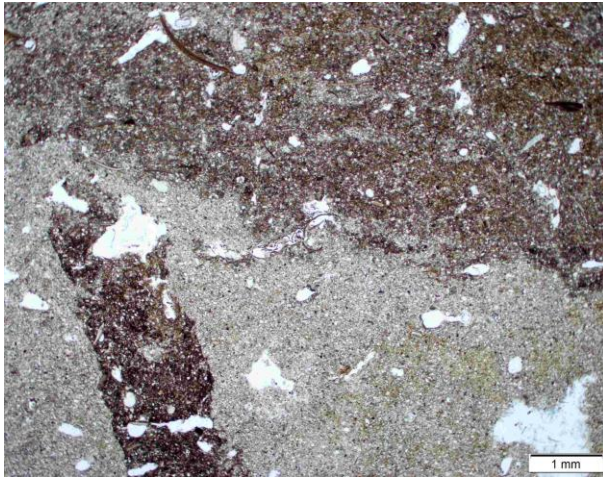

C: scharfe Sedimentgrenze

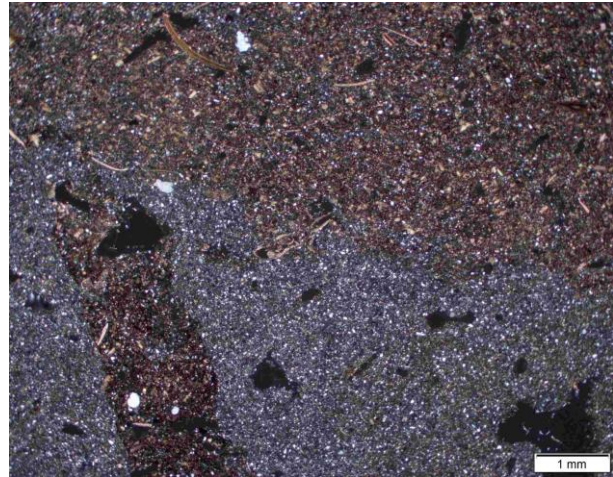

D: wie C, xpl

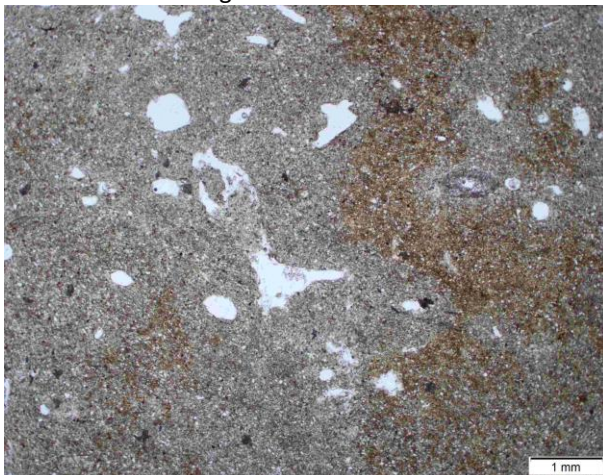

E: typisches Material im unteren Schliffabschnitt

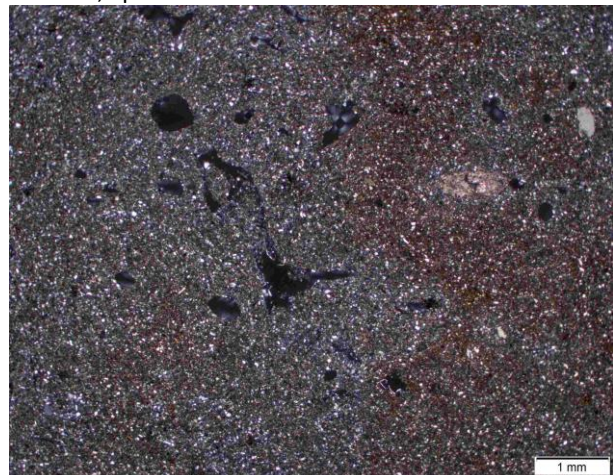

F: wie E, xpl



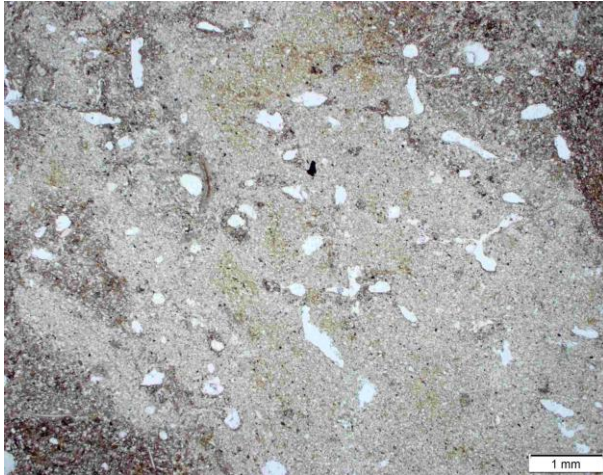

G: Fetzen hellen Materials im oberen Schliffabschnitt

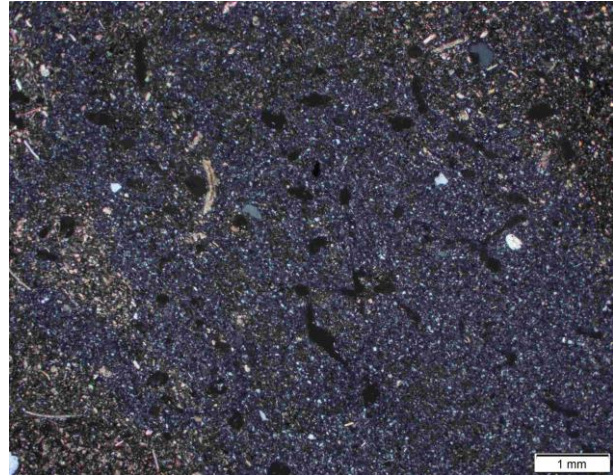

H: wie G, xpl

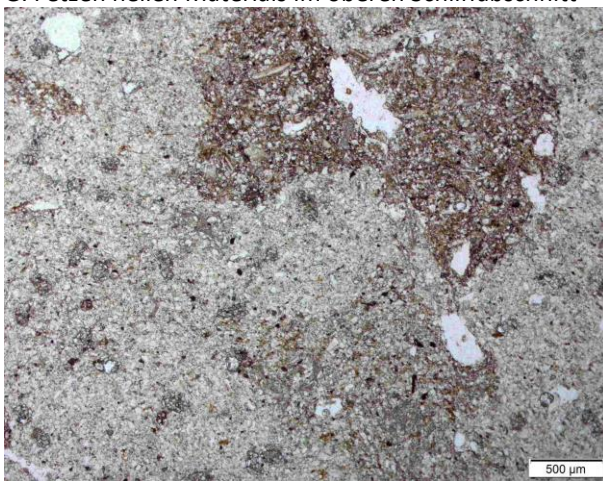

I: bioturbate Einmischung kalkreichen Materials im unteren Schliffabschnitt

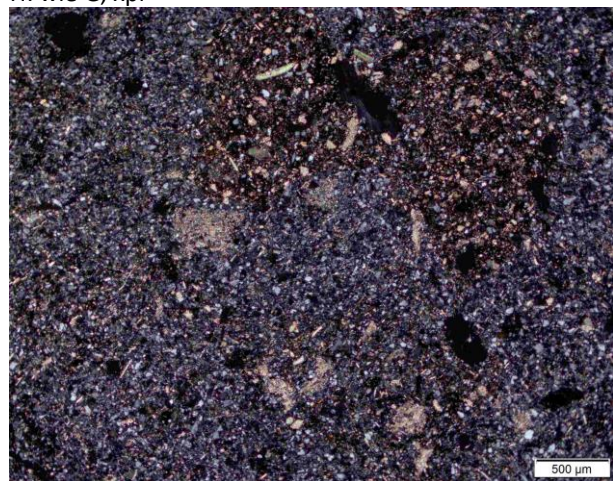

J: wie I, xpl

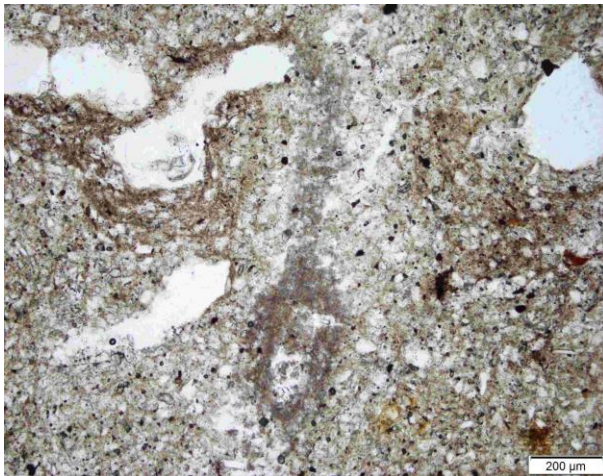

K: Sekundärcarbonatausfällung

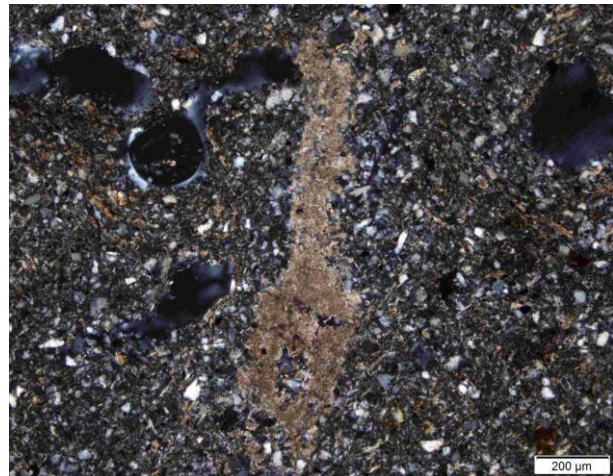

L: wie K, xpl



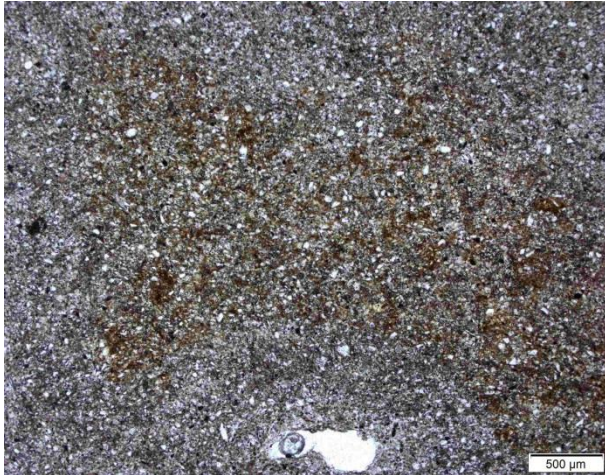

M: Eisenoxidimprägnierung der Matrix im unteren Schliffabschnitt

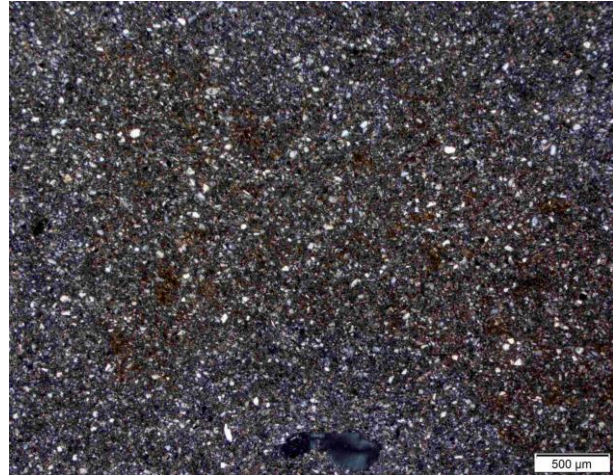

N: wie M, xpl

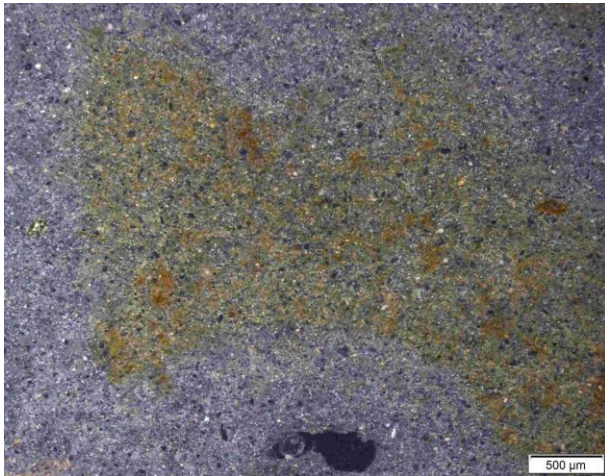

O: wie M, oil

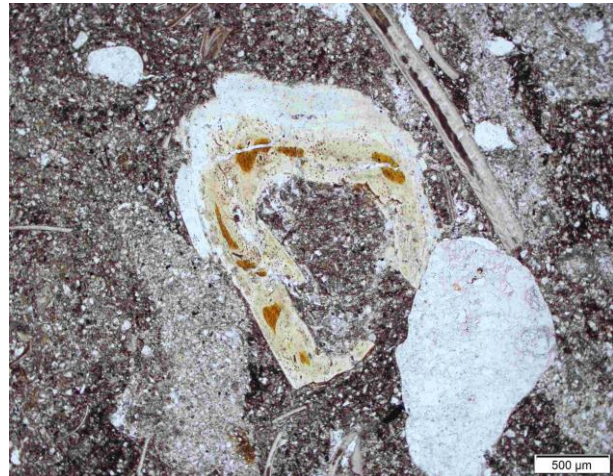

P: Knochenstück

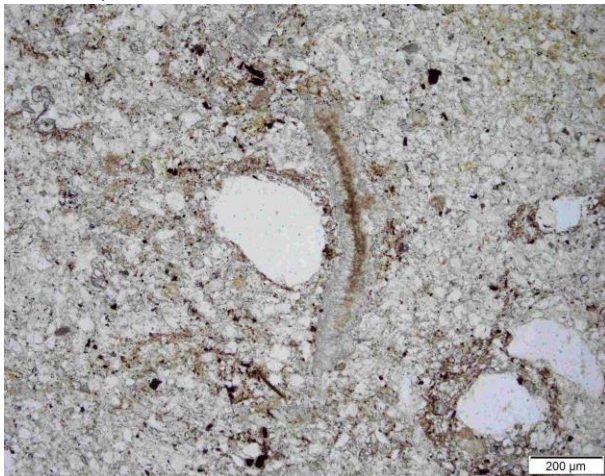

Q: angewitterte Molluskenschale

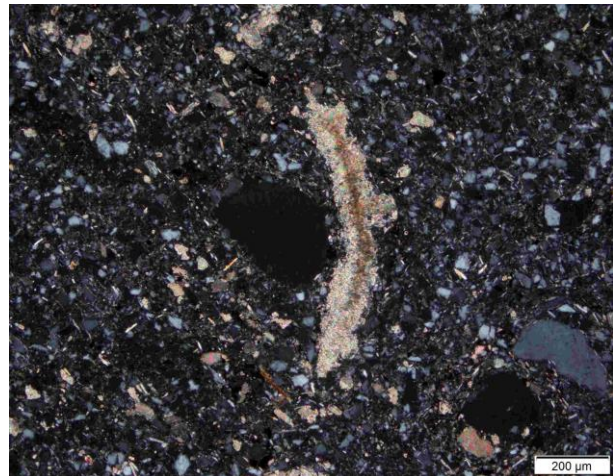

R: wie Q, xpl



#### 4. Interpretation der Ergebnisse

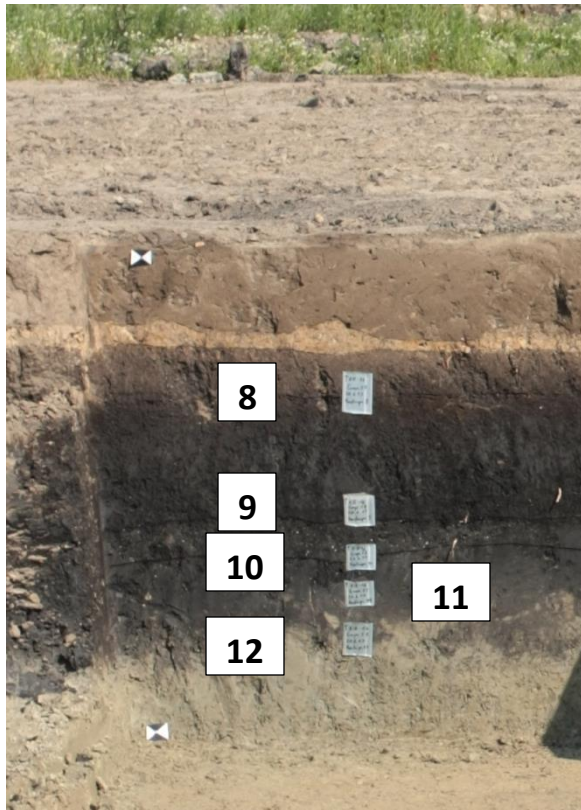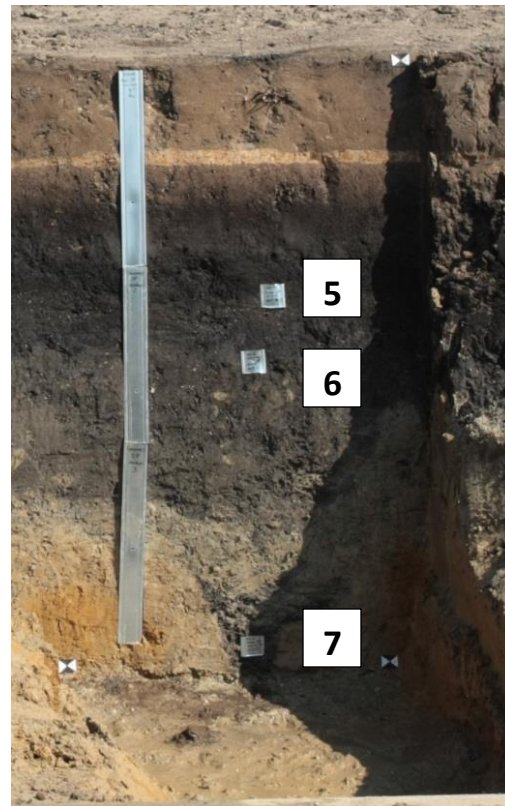

| No. | Einheit | Einheit |
|-----|---------|---------|
| 5   |         | D/E     |
| 6   |         | F/I     |
| 7   |         | M       |
| 8   | C/D     |         |
| 9   | D/E     |         |
| 10  | E/F     |         |
| 11  | F/G     |         |
| 12  | G/H     |         |



Das zuunterst anstehende Substrat (erfasst in Dünnschliff 12 unten und in Dünnschliff 7 in der Mischung, entspricht Einheit H) ist feinkörnig (überwiegend schluffig), hellgrau gefärbt und dicht gelagert. Es ist kalkfrei bis kalkarm und enthält stellenweise sekundärcarbonatische Ausfällungen, die mit dem Sickerwasser aus darüberliegenden, kalkreicheren Sedimenten in das Material gelangt sind. Die hellgraue Färbung ist wohl Resultat reduzierender Bedingungen (Sauerstoffabschluss) bedingt durch einen hohen Grundwasserstand. Die im Schliff 12 auftretenden Eisenoxidflecken sind erst mit dem Luftzutritt bei der Freilegung des Materials bzw. der Probennahme und Verarbeitung entstanden. Die im Dünnschliff 12 erfasste Sedimentgrenze ist extrem scharf ausgebildet. Bioturbation hat dazu geführt, dass Teile der verschiedenen Substrate (Einheit G – kalkreiches, dunkel gefärbte Material, Einheit H – kalkfrei bis kalkarm, hell gefärbt) in biogenen Wühlstrukturen in das jeweils andere Material eingemischt wurden. Jedoch finden sich im oberen Bereich (Einheit G) des Dünnschliffs 12 große, fetzenartige Einschaltungen des Materials der Einheit H. Diese sind nicht auf bioturbate Prozesse zurückzuführen und wohl durch menschliches Wirken eingemischt. Eine genauere Aktivitätsbeschreibung ist nicht möglich, da keinerlei Prozessspuren aus der Sedimentstruktur abgeleitet werden können (keine Verdichtung durch Vertritt, keine Spuren einer zeitweisen Oberfläche o.Ä.). Im Dünnschliff 7 ist das helle Material ein Teil der unteren Verfüllung einer Grubenstruktur. Hier sind nicht gerundete Aggregate des hellen Materials mit dunkler gefärbtem, kalkhaltigem Material vermischt. Die fehlende Zurundung der Aggregate und die chaotische Lagerung deuten an, dass es sich um eine intentionelle Verfüllung der Grube handelt. Langsame Sedimentationsprozesse hätten Schichtungen/Laminierungen der Grubenfüllung und eine Rundung der Aggregate durch Abrollen bewirkt, die im untersuchten Material völlig fehlen. Dies bedeutet, dass an beiden Beprobungsstellen der Übergang vom dunklen, humosen Material zum hellen, humusfreien Substrat anthropogen gestört ist.

Das Material der Einheit G bildet den oberen Teil des Dünnschliffs 12, sowie den unteren Teil des Dünnschliffs 11. In beiden Schliffabschnitten finden sich biogene Einmischungen der angrenzenden Substrate. Da das Material im Dünnschliff 12 anthropogen überformt ist, trifft dies möglicherweise auch auf das Substrat in Dünnschliff 11 zu (im unteren Abschnitt Material der Einheit G). Allerdings sind hier keine fetzenartigen Einschaltungen oder Aggregate zu erkennen, die eine anthropogene Überprägung des Substrats belegen könnten. Das Substrat der Einheit G ist sehr stark kalkhaltig und enthält zahlreiche Molluskenschalen. Es entspricht in seinen Materialeigenschaften damit dem dunklen Material in Dünnschliff 7, dass zusammen mit dem hellen Substrat den untersten Teil der Grubenfüllung (Einheit M) bildet.

Das Substrat der Einheit F unterscheidet sich stark im Kalk- und Humusgehalt vom unterlagernden Material der Einheit G. Das Material in Einheit F ist durch den hohen Anteil organischer Substanz dunkel gefärbt und ist weitgehend kalkfrei. Durch bioturbate Einmischung aus den angrenzenden Substraten der Einheiten G und E, finden sich aber auch hier vereinzelt Bruchstücke von Molluskenschalen oder biogene Gangfüllungen mit kalkhaltigem Substrat. Im Dünnschliff 6 findet sich entsprechendes Material als Teil der oberen Grubenfüllung dunkles, kalkarmes aber humusreiches Material, dass mit hell gefärbtem Substrat in Form von scharf abgegrenzten Aggregaten.

Das Material der Einheit E ist in den Dünnschliffen 9 und 10 sowie im unteren Teil des Dünnschliffs 5 zu finden. Es handelt sich um ein humusreiches, kalkhaltiges Substrat, dass sehr viel Molluskenschalen enthält. Da das Material im Dünnschliff 5 nur bioturbate Einmischungen enthält, also keine Aggregate, die auf eine anthropogene Aktivität hindeuten könnten, ist davon auszugehen, dass auch in diesem Bereich



der Senke eine rein natürliche Genese des Materials der Einheit E wahrscheinlich ist. Auch das Substrat der Einheit D, dass sich im oberen Teil des Dünnschliffs 5 findet, erscheint mit Ausnahme bioturbater Prozesse ungestört und gleicht in seinen Eigenschaften dem in den Schliffen 8 und 9 beprobten Material der Einheit D. Das Substrat ist kalkfrei (bis auf bioturbate Einmischungen aus Einheit E) und enthält viel organische Substanz. Anzeichen anthropogener Materialumlagerung fehlen.

Material der Einheit C ist nur im Dünnschliff 8 erfasst. Es ist ebenfalls kalkfrei und enthält organische Substanz, allerdings weniger als das darunterliegende Substrat. Das Substrat ist reich größeren Pflanzenresten und es finden sich Sklerotien und zum Teil auch Holzkohle. Möglicherweise handelt es sich um Reste des Bodens, der vor der künstlichen Aufschüttung zur Reliefbegradigung als humoser Horizont (Ah oder M) an oder nahe der Geländeoberfläche ausgebildet war.

Insgesamt sind nur in den Dünnschliffen der Grubenfüllung (6, 7) und im Dünnschliff 12 Anzeichen einer anthropogenen Sedimentüberformung zu finden, die eine künstliche Substratvermischung (12) bzw. die intentionelle, schnelle Verfüllung einer Grube belegen.

Schon die zuunterst erfassten Substrate geben Hinweise auf einen hohen Grundwasserstand: Das helle Material ist reduktionsfarben grau und verfärbt sich bei Luftzutritt durch die Oxidation von pedogenem Eisen. Das Substrat der Einheiten F und G, das auch als Grubenfüllungsmaterial in den Einheiten I und M vorkommt, ist humusreich und enthält Knochenstückchen und Molluskenschalen (allerdings weniger als Einheit E). Die Humuserhaltung und der Erhalt der Knochen- und Molluskstücke deuten auf schlecht drainierte Verhältnisse hin. Eine Bildung im Wasser oder die Austrocknung einer Vernässungsstelle kann allerdings durch keine Sedimentmerkmale belegt werden.

Das Substrat der Einheit E ist noch reicher an organischer Substanz und enthält zahllose Molluskenschalen und einige Knochenstücke. An anderer Stelle im Bereich der dunkel verfüllten Senke (vgl. Auswertung KIE-16, Geoprofil 46) konnten ebenfalls zahlreiche Molluskenschalen und Knochen gefunden werden. Dabei war es möglich, ein Knochenstück eindeutig als Fischknochen zu identifizieren, was eine Sedimententstehung in einem perennierenden Gewässer andeutet. Innerhalb des Sediments sind keine genetisch auswertbaren Strukturen erkennbar (z.B. Laminierung aufgrund jahreszeitlicher Seesedimente oder graduelle Kornverfeinerungen (fining-up-Sequenzen) die durch Austrocknung eines Gewässers entstehen). Die Grenze zum darüber liegenden Material der Einheit D ist fließend, spricht also gegen einen abrupten Wechsel in den Sedimentationsbedingungen oder einen Hiatus durch Erosion und Überdeckung. Das Material ist allerdings weitgehend kalkfrei und enthält kaum Molluskenschalen (mit Ausnahme bioturbater Einmischungen von unten). Eine Bildung unter gleichen Bedingungen wie bei der Entstehung des Materials der Einheit E ist daher unwahrscheinlich. Möglicherweise handelt es sich bei dem Material der Einheit D um ein Kolluvium, das aus Oberbodenmaterial der Umgebung (Ah-Material, humusreich) besteht. Die damit verbundene Geländeerhöhung könnte zu einem periodischen Trockenfallen des Gewässers (keine Fische und Wassermollusken mehr) und in der Austrocknungszeit auch zur Sedimententkalkung durch terrestrische Bodenbildungsprozesse geführt haben. Sedimentstrukturen, die diese Vorgänge belegen könnten, fehlen indessen auch hier.



## 5. Literatur

Bullock, P.; Fedoroff, N.; Jongerius, A.; Stoops, G. & Tursina, T., [Eds.] (1985): Handbook for soil thin section description.- 152 S.; Albrighton, Wolverhampton [Waine Research Publications].

Stoops, G. (2003): Guidelines for analysis and description of soil and regolith thin sections.- XVI+184 S.; Madison [Soil Science Society of America, Inc.].
